# Supplementary material
Source: ML conference proceedings conference paper supplement (https://openreview.net/forum?id=s6bKLlF4Pe)

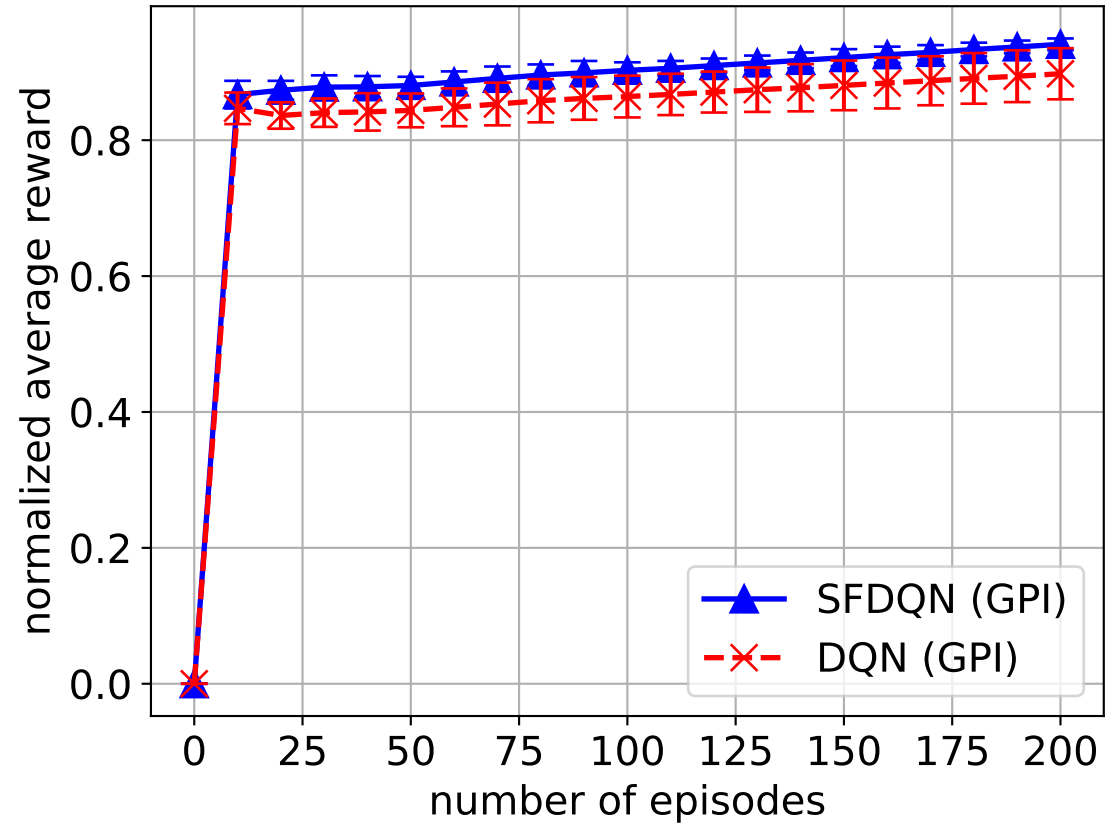

Supplement: supplementary_material [file attachment]

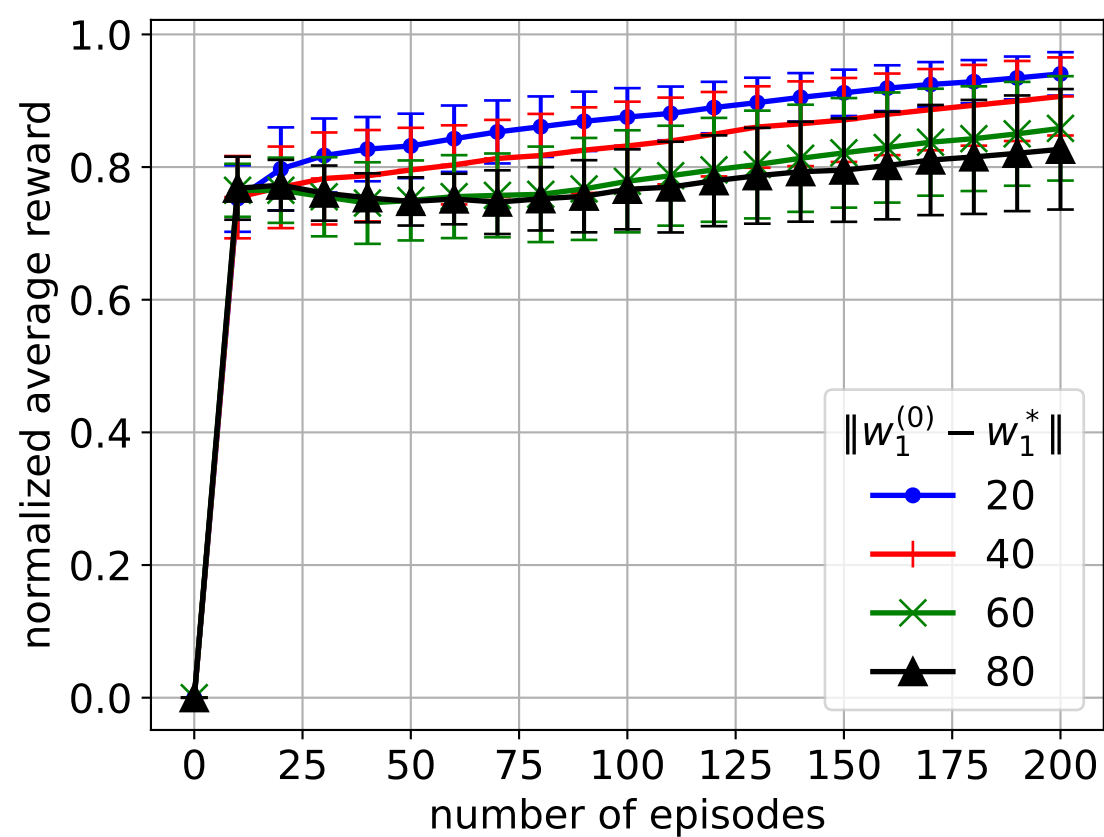

Supplement: supplementary_material [file attachment]

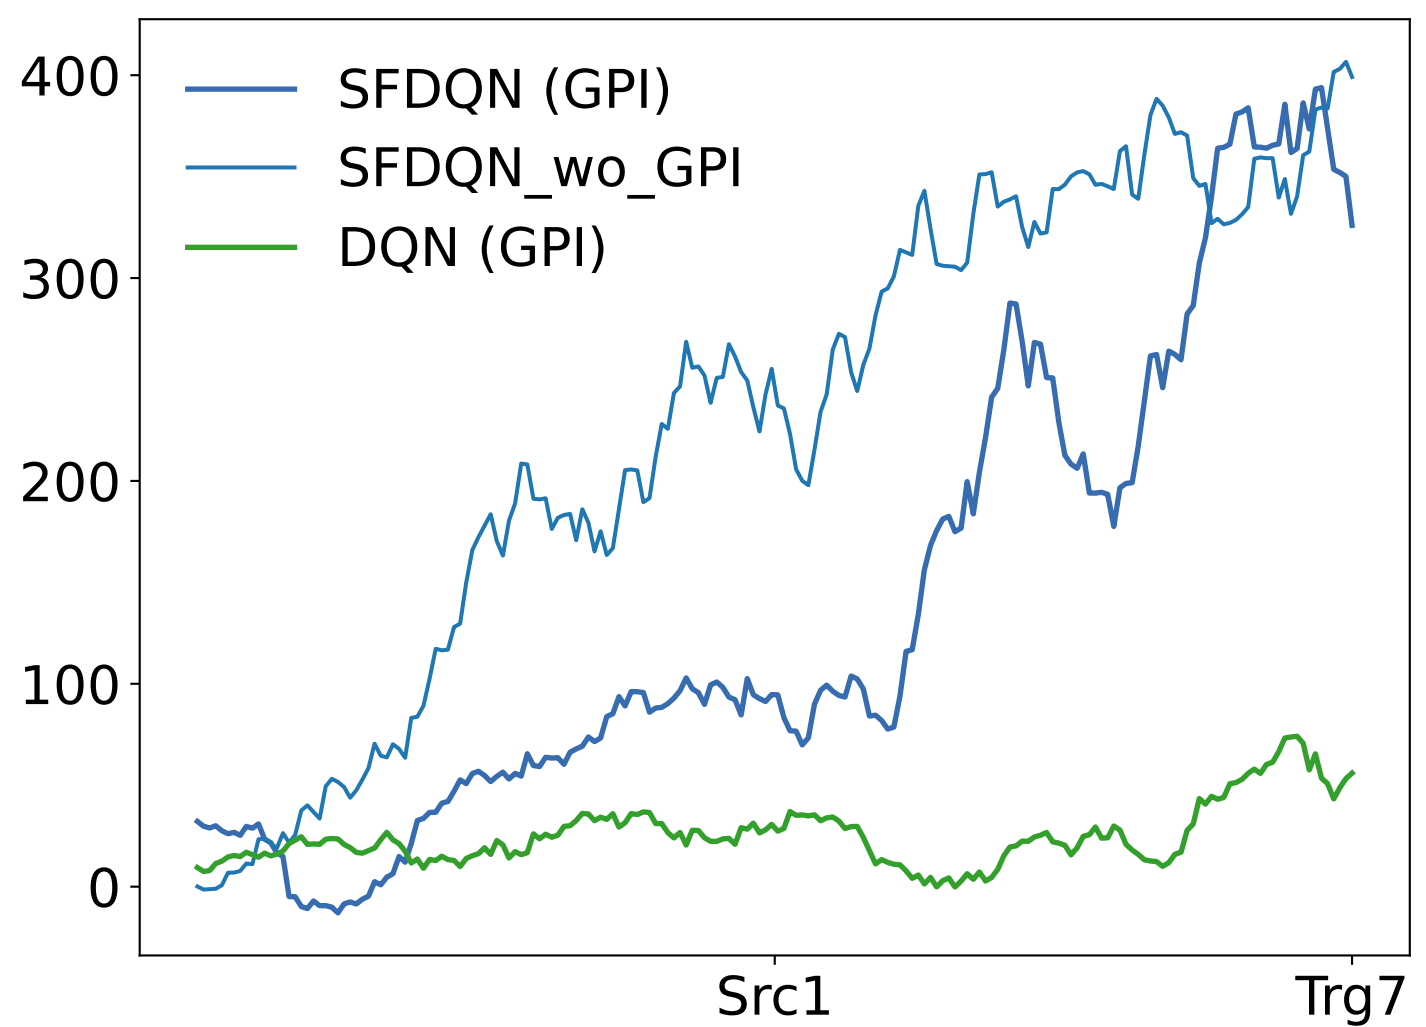

Supplement: supplementary_material [file attachment]

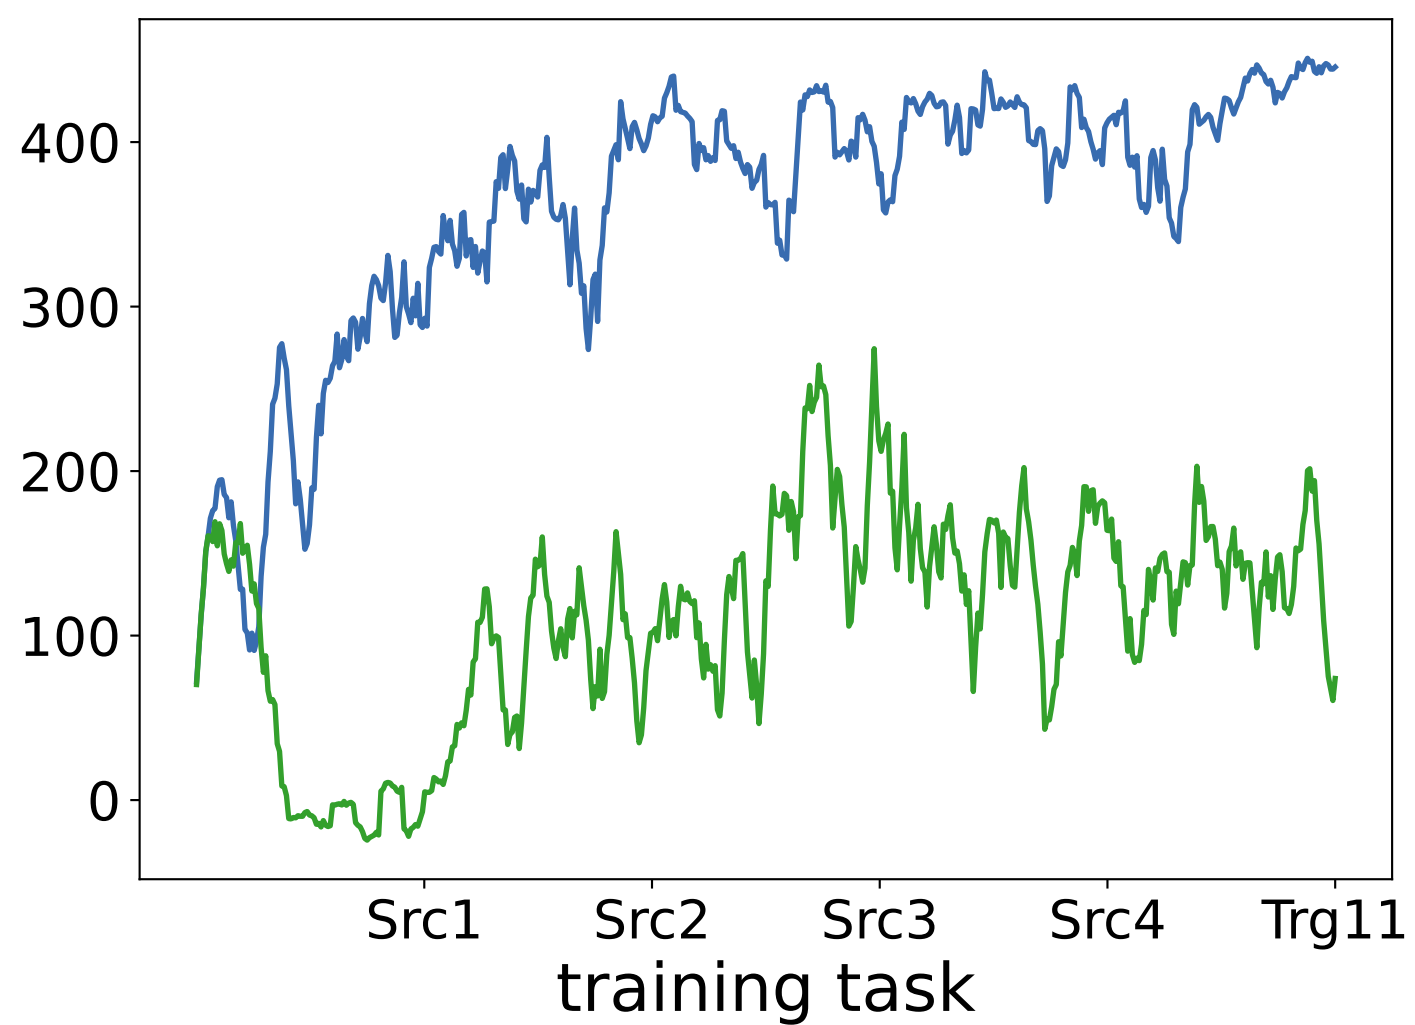

Supplement: supplementary_material [file attachment]

test task reward

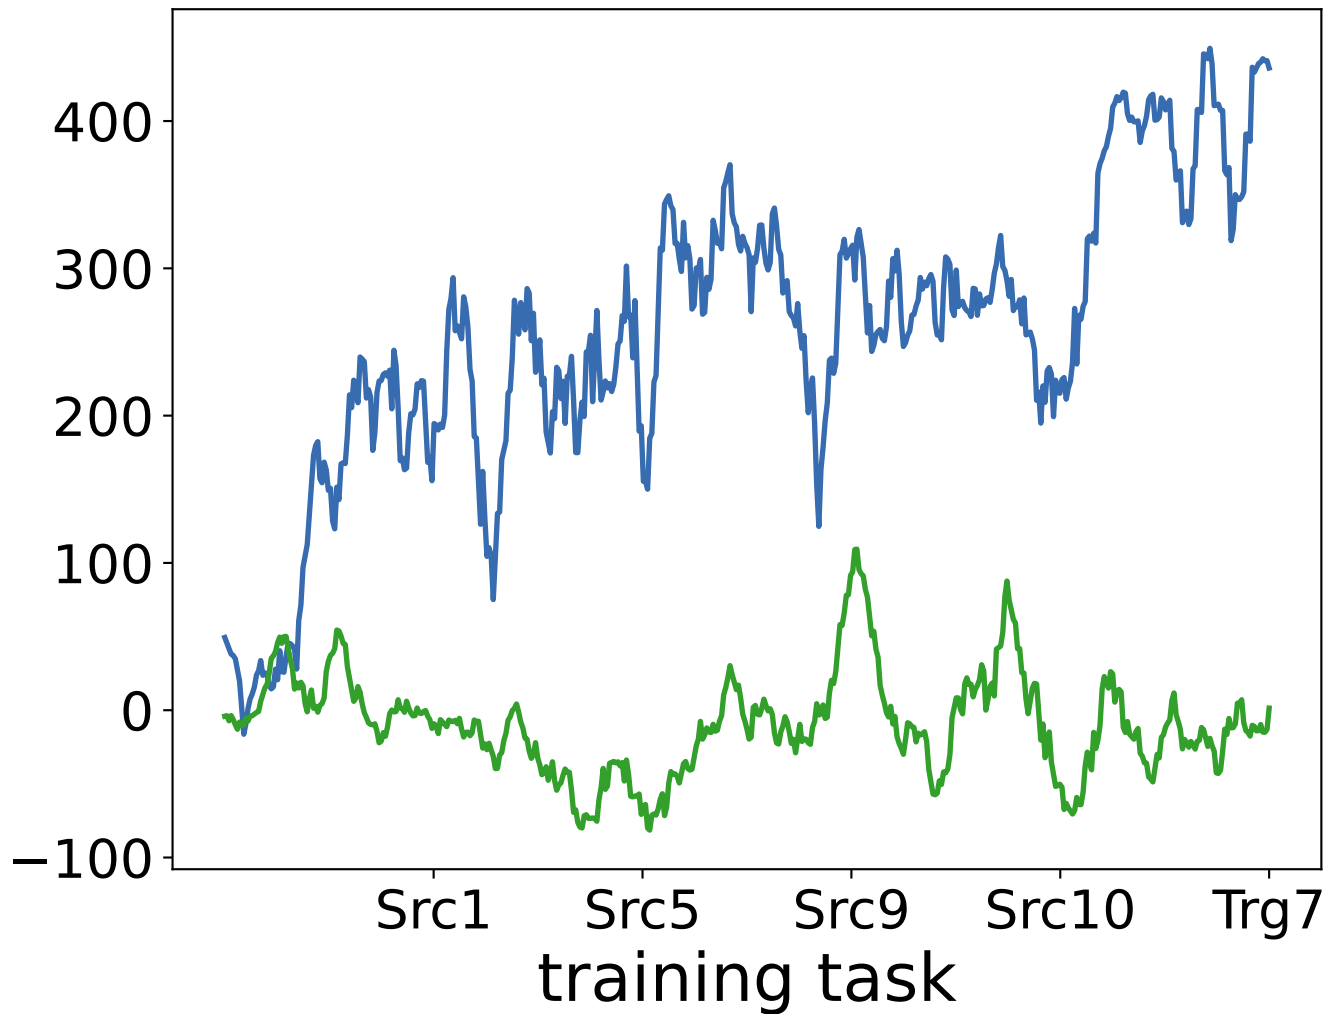

Supplement: supplementary_material [file attachment]

target task reward

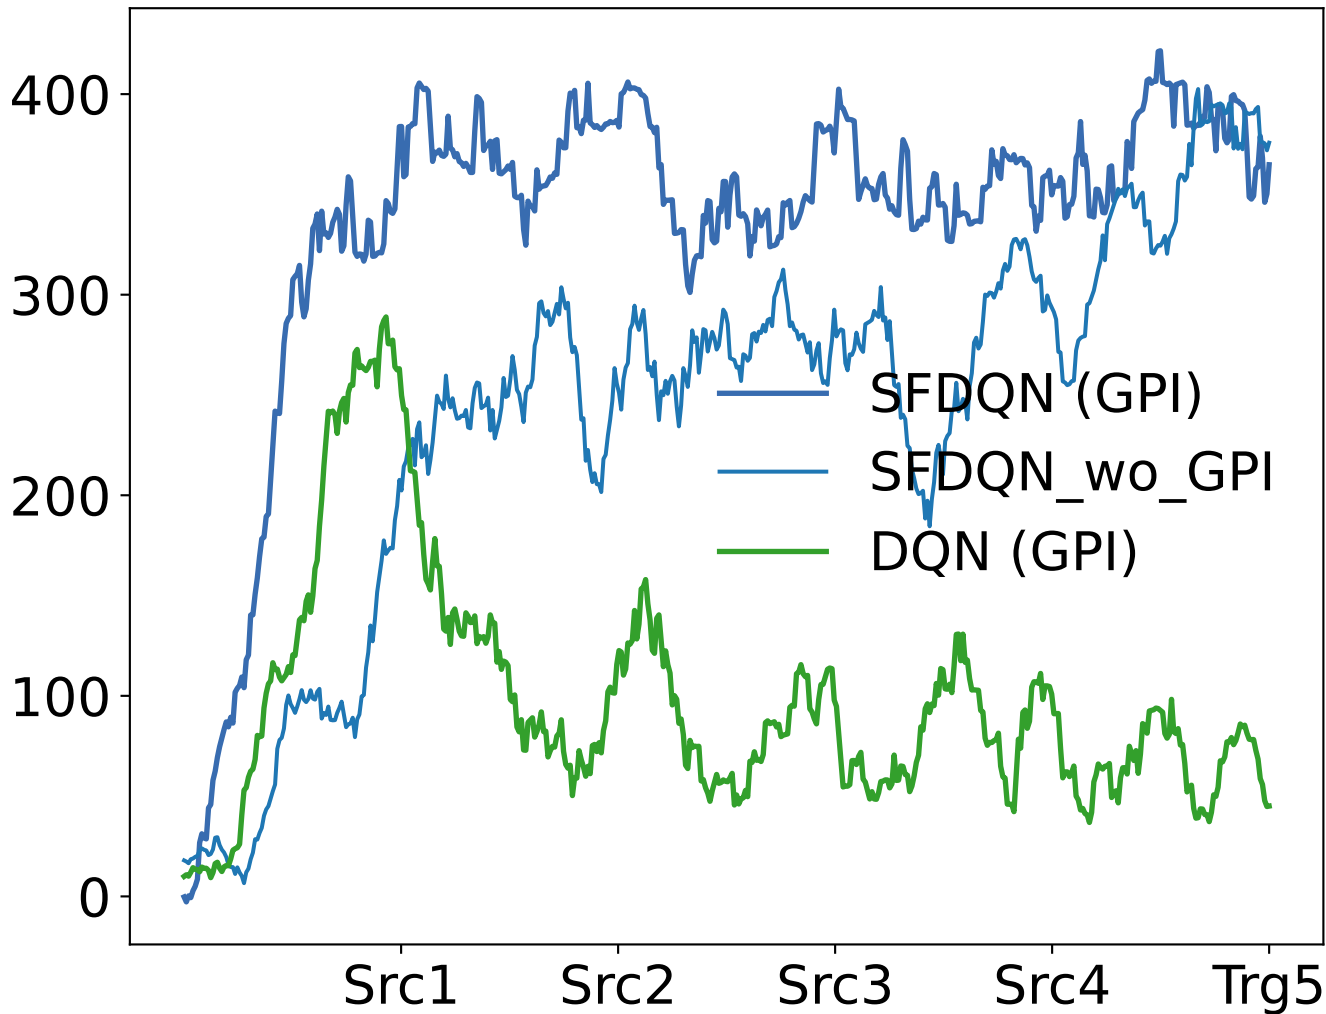

Supplement: supplementary_material [file attachment]

test task reward

400  
300  
200  
100  
0  
-100

Src1

Src5

Src9

Src10

Trg2

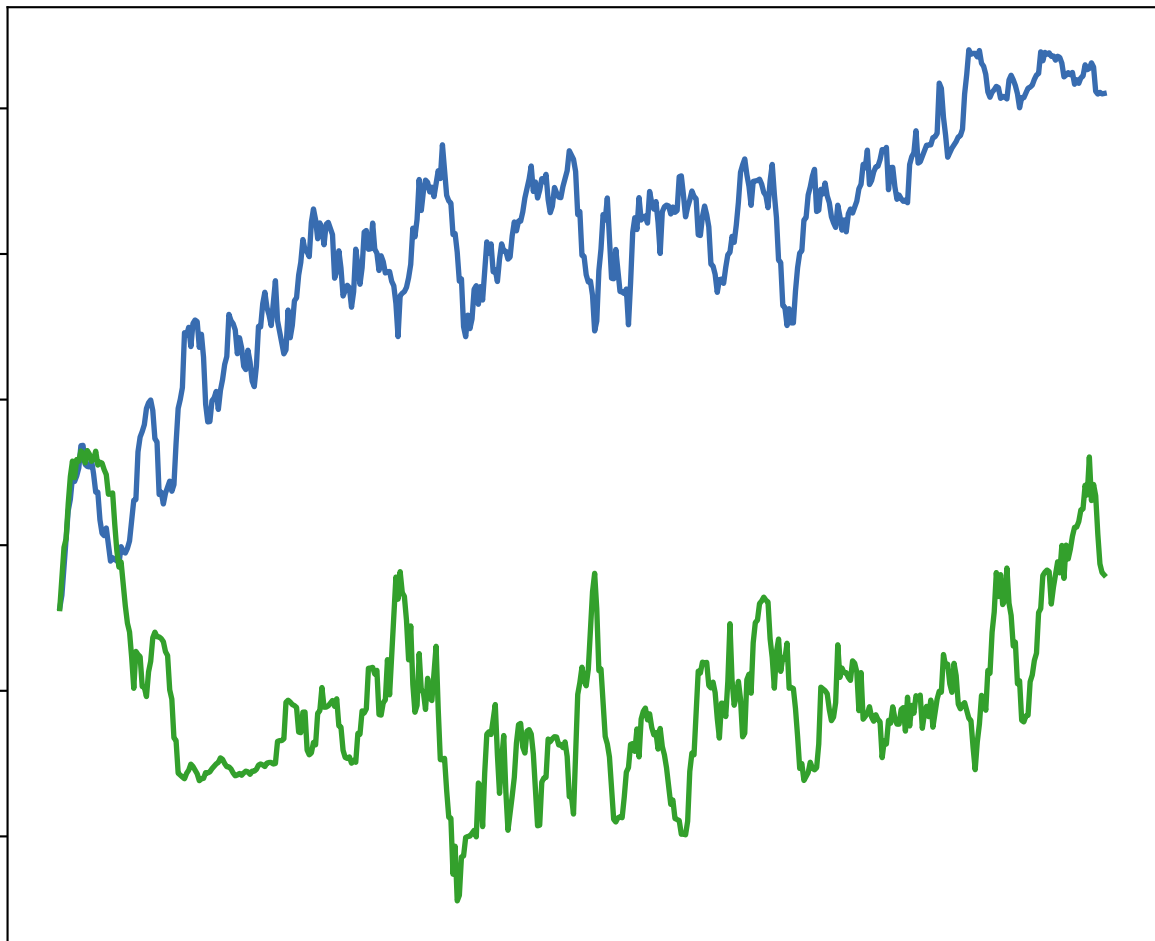

Supplement: supplementary_material [file attachment]

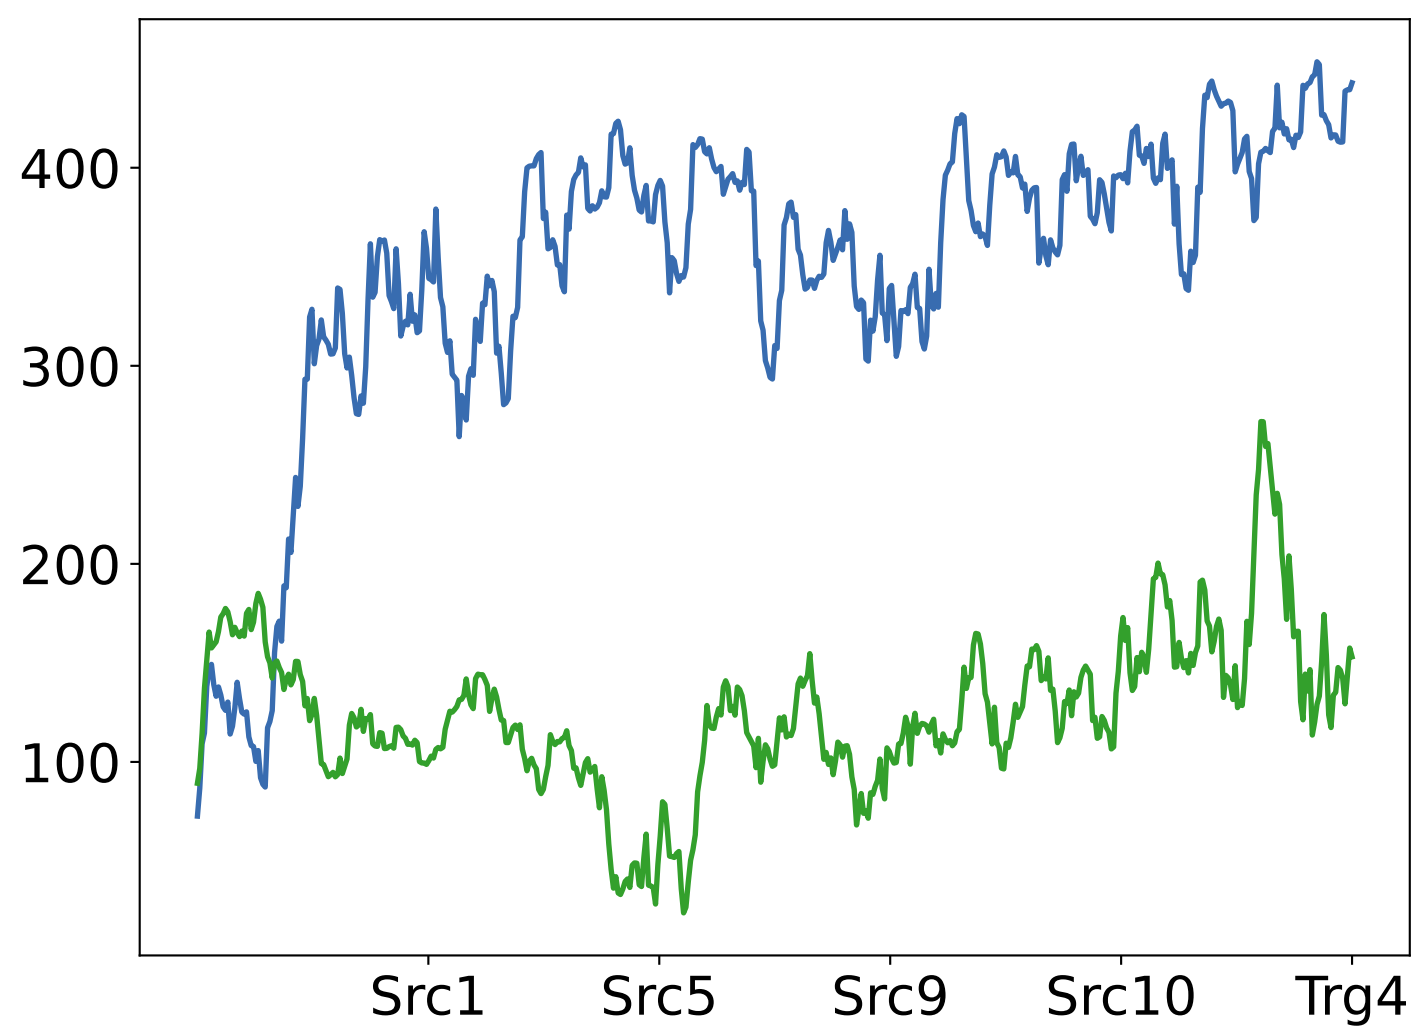

Supplement: supplementary_material [file attachment]

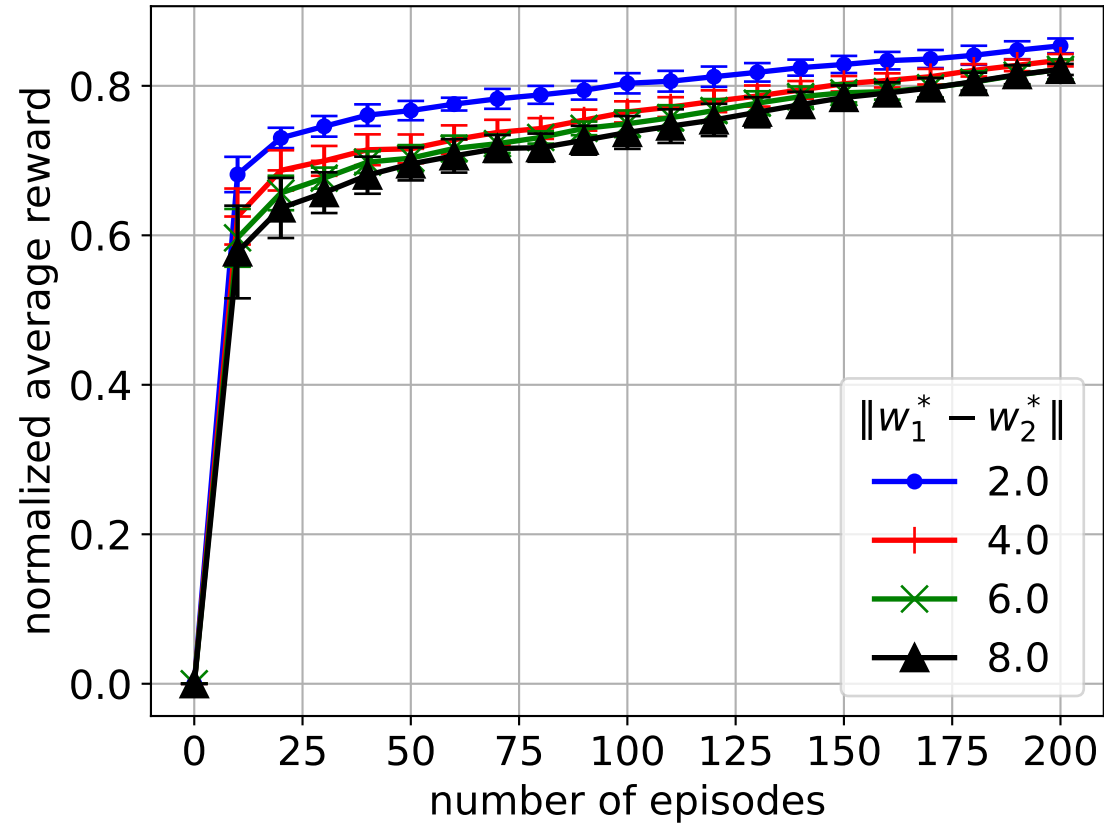

Supplement: supplementary_material [file attachment]

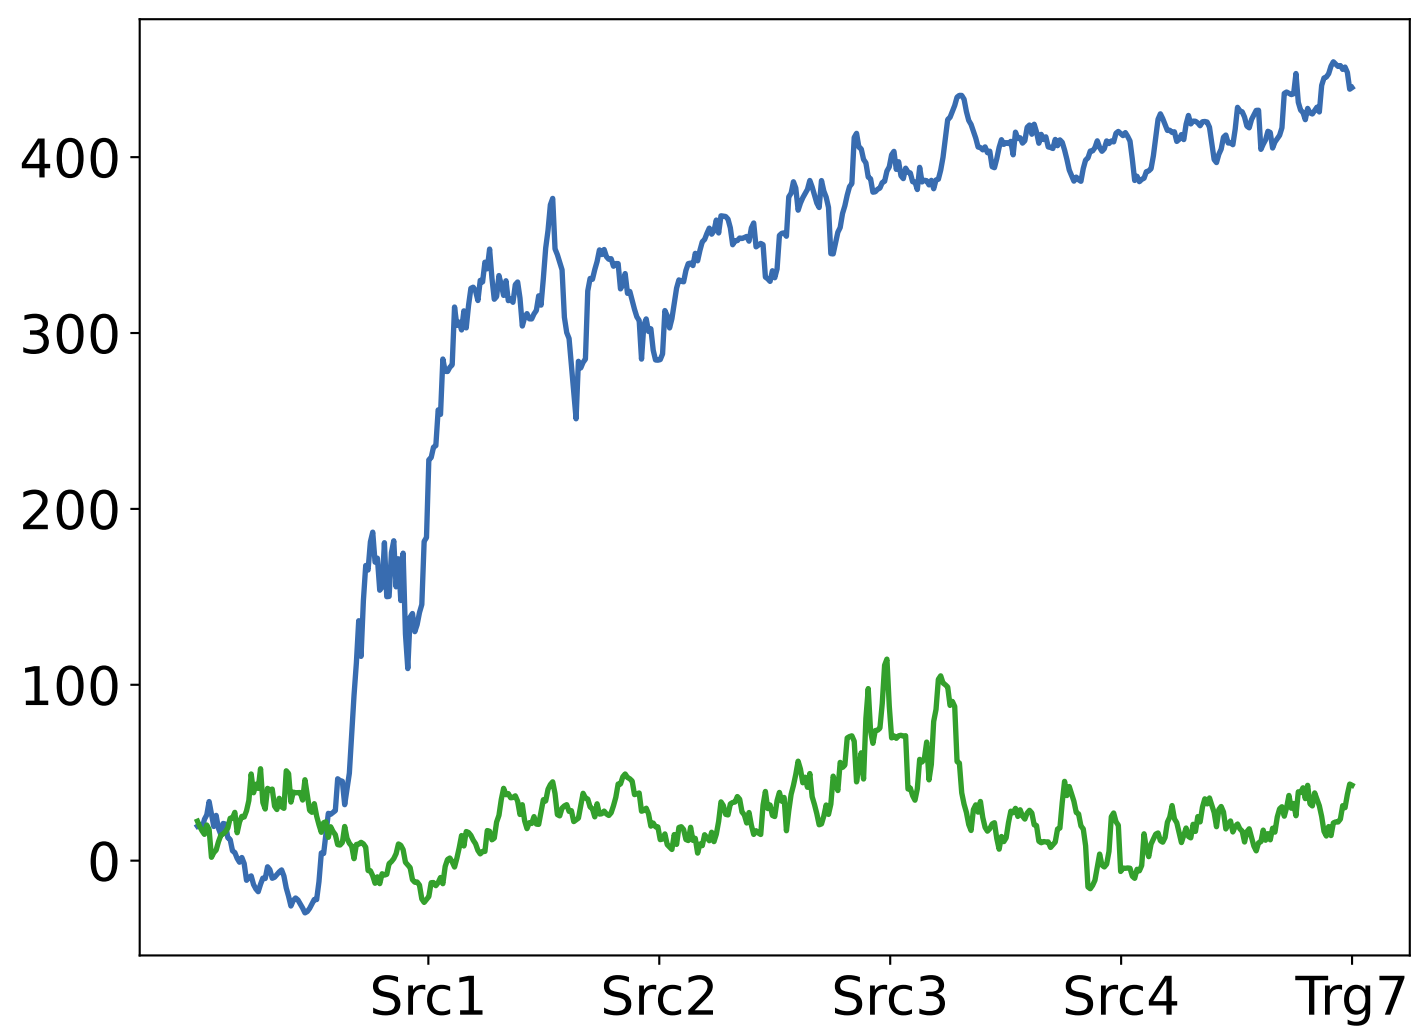

Supplement: supplementary_material [file attachment]

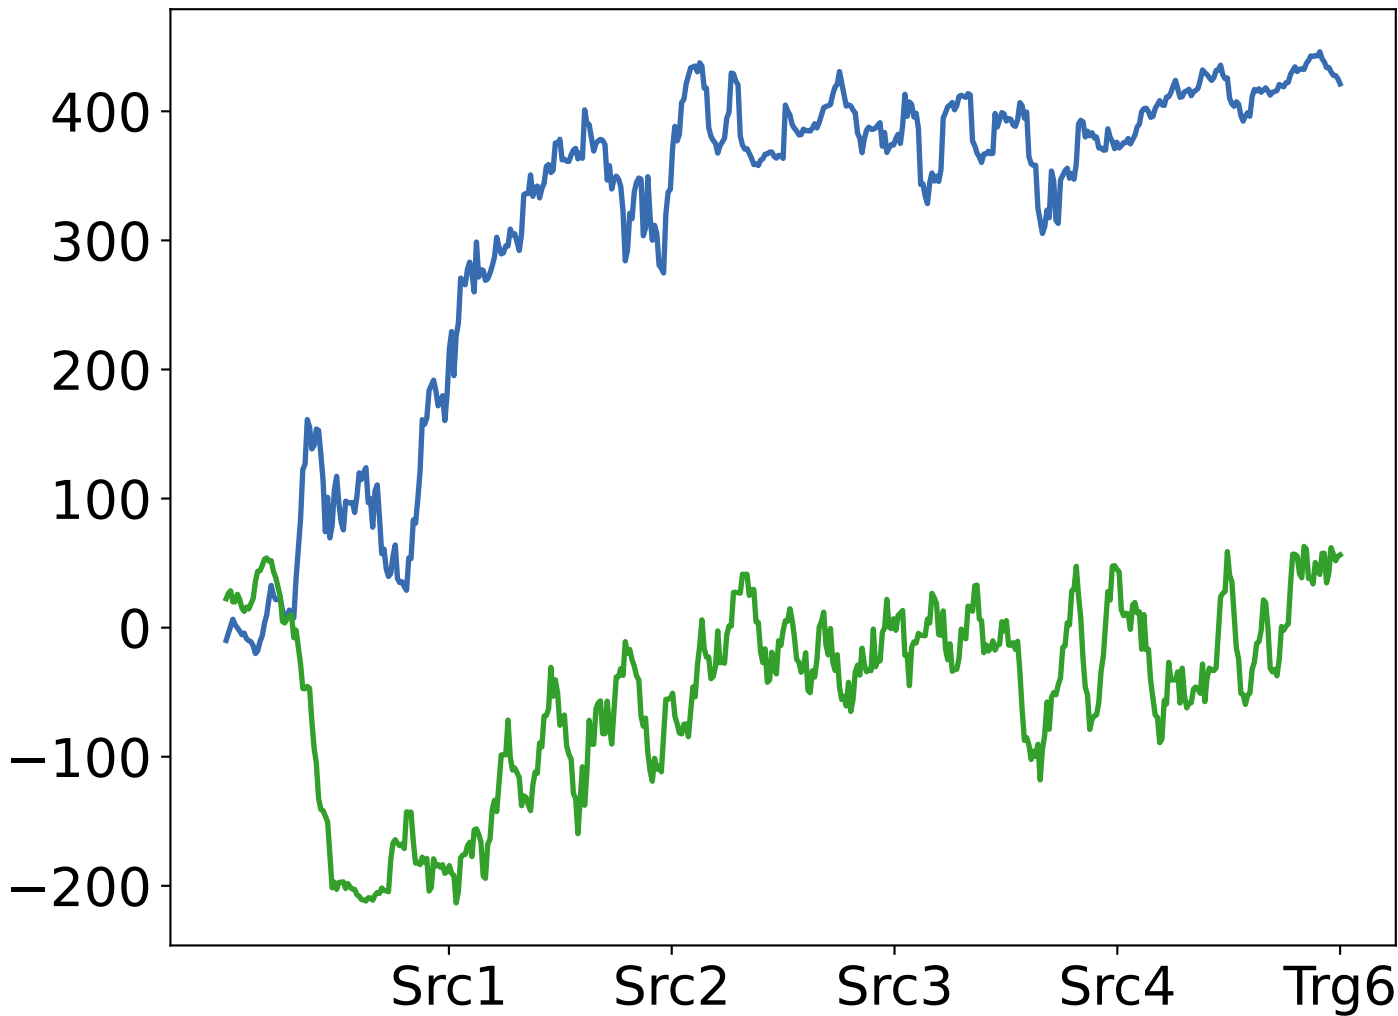

Supplement: supplementary_material [file attachment]

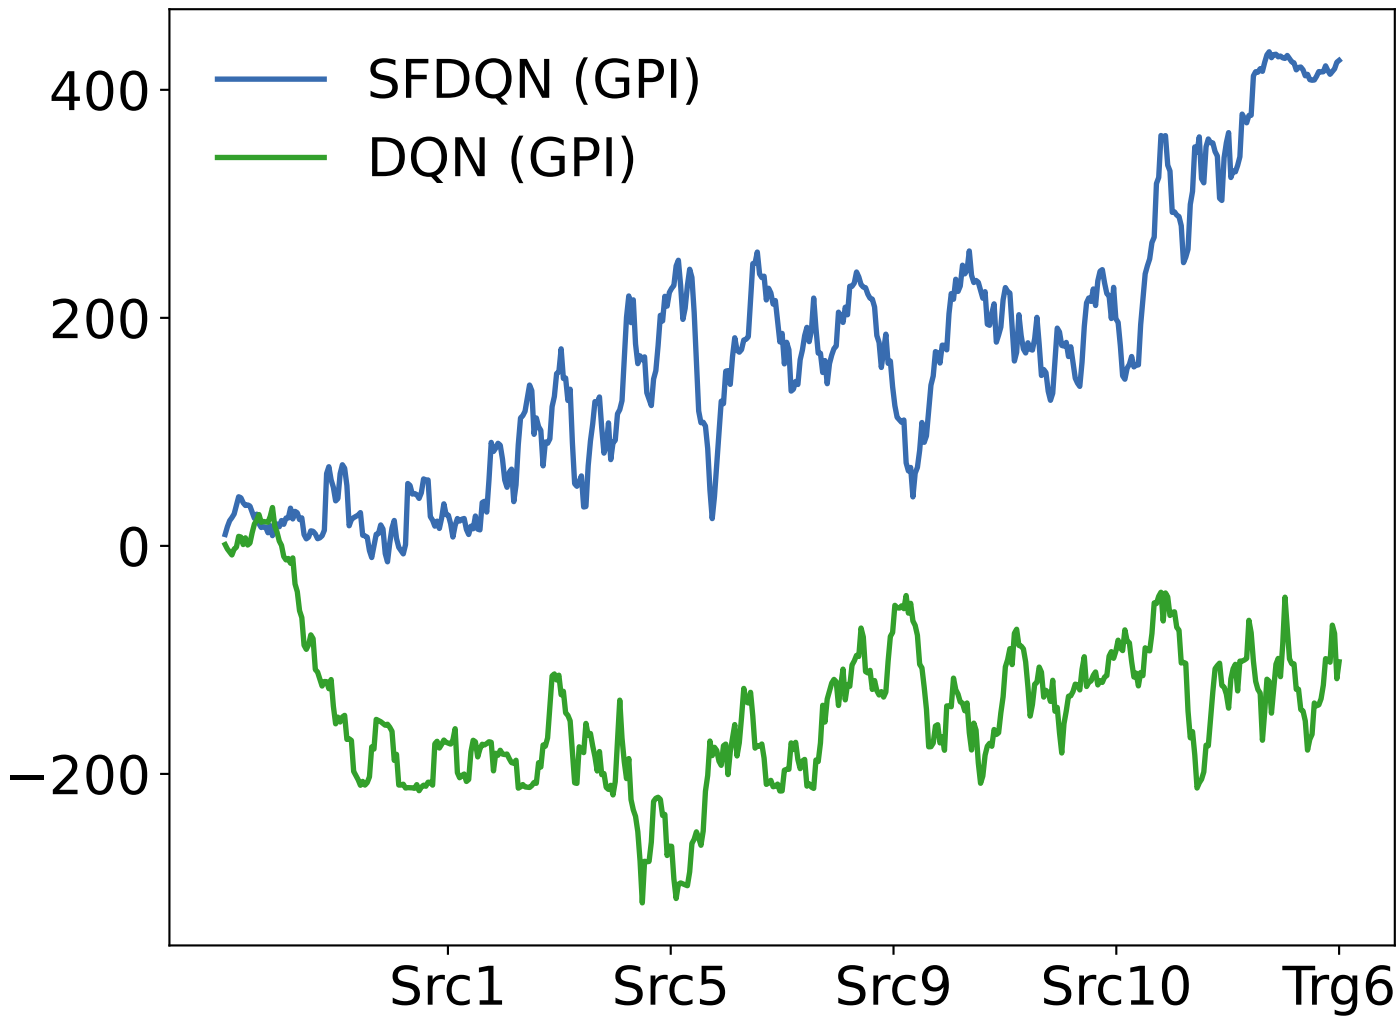

Supplement: supplementary_material [file attachment]

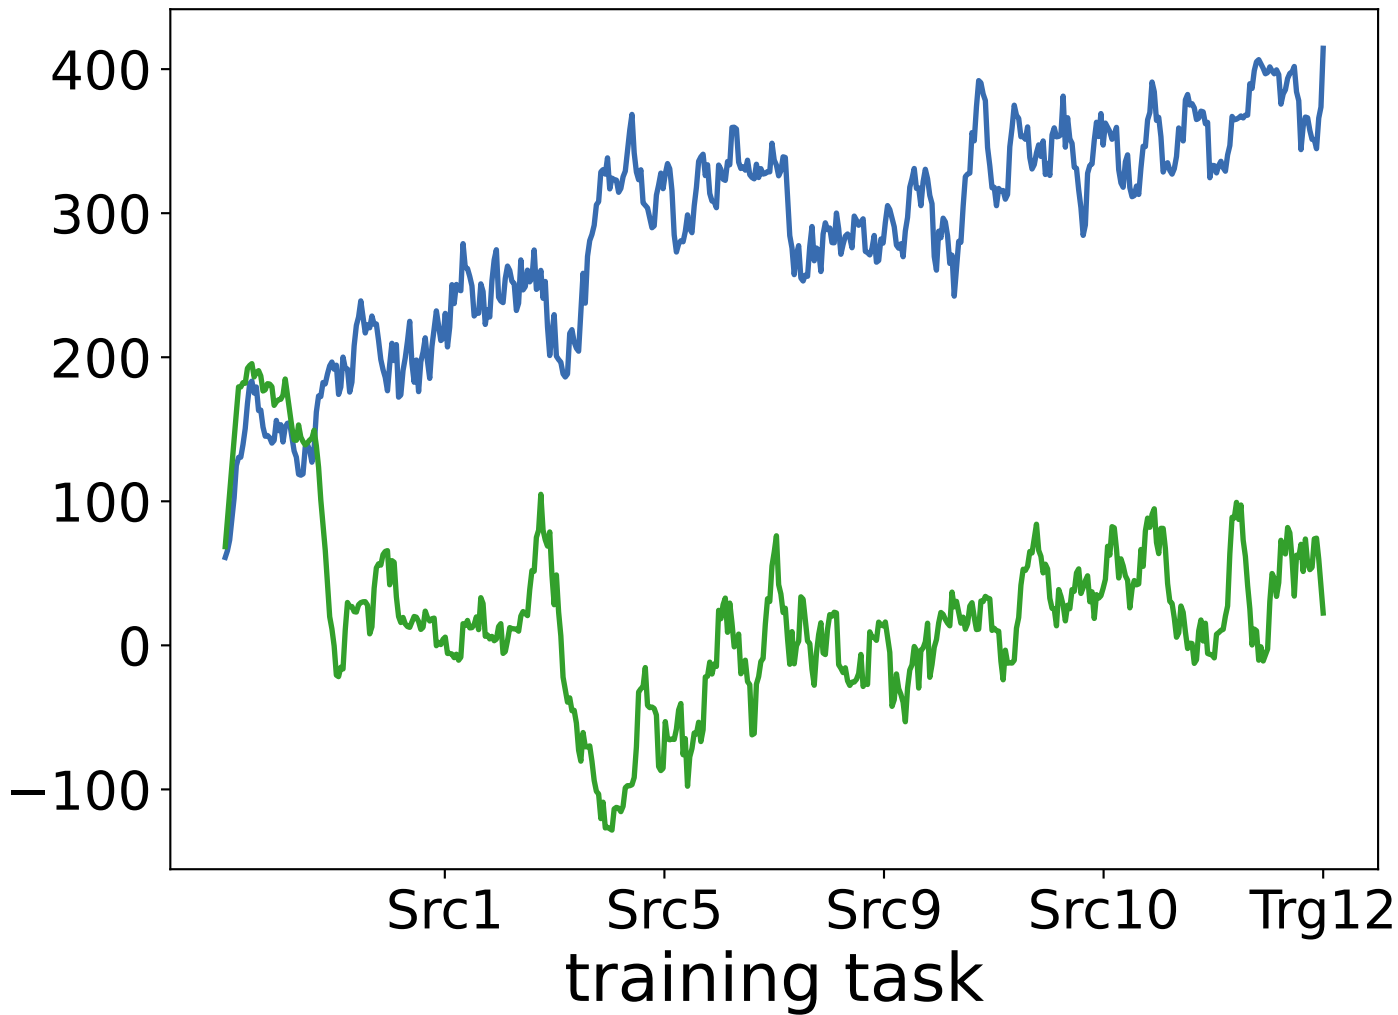

Supplement: supplementary_material [file attachment]

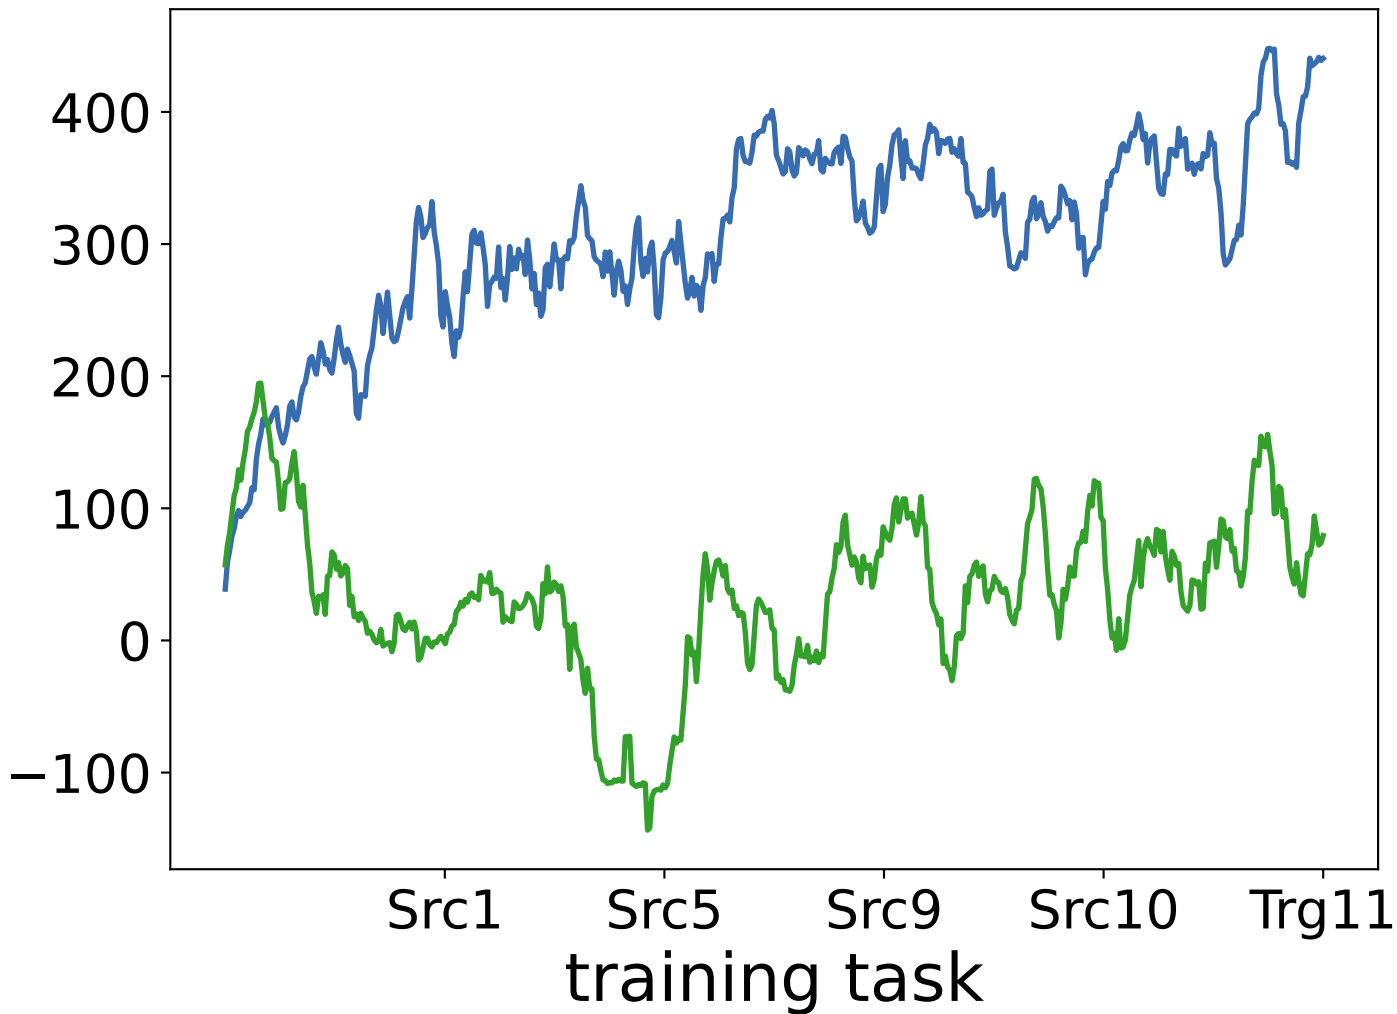

Supplement: supplementary_material [file attachment]

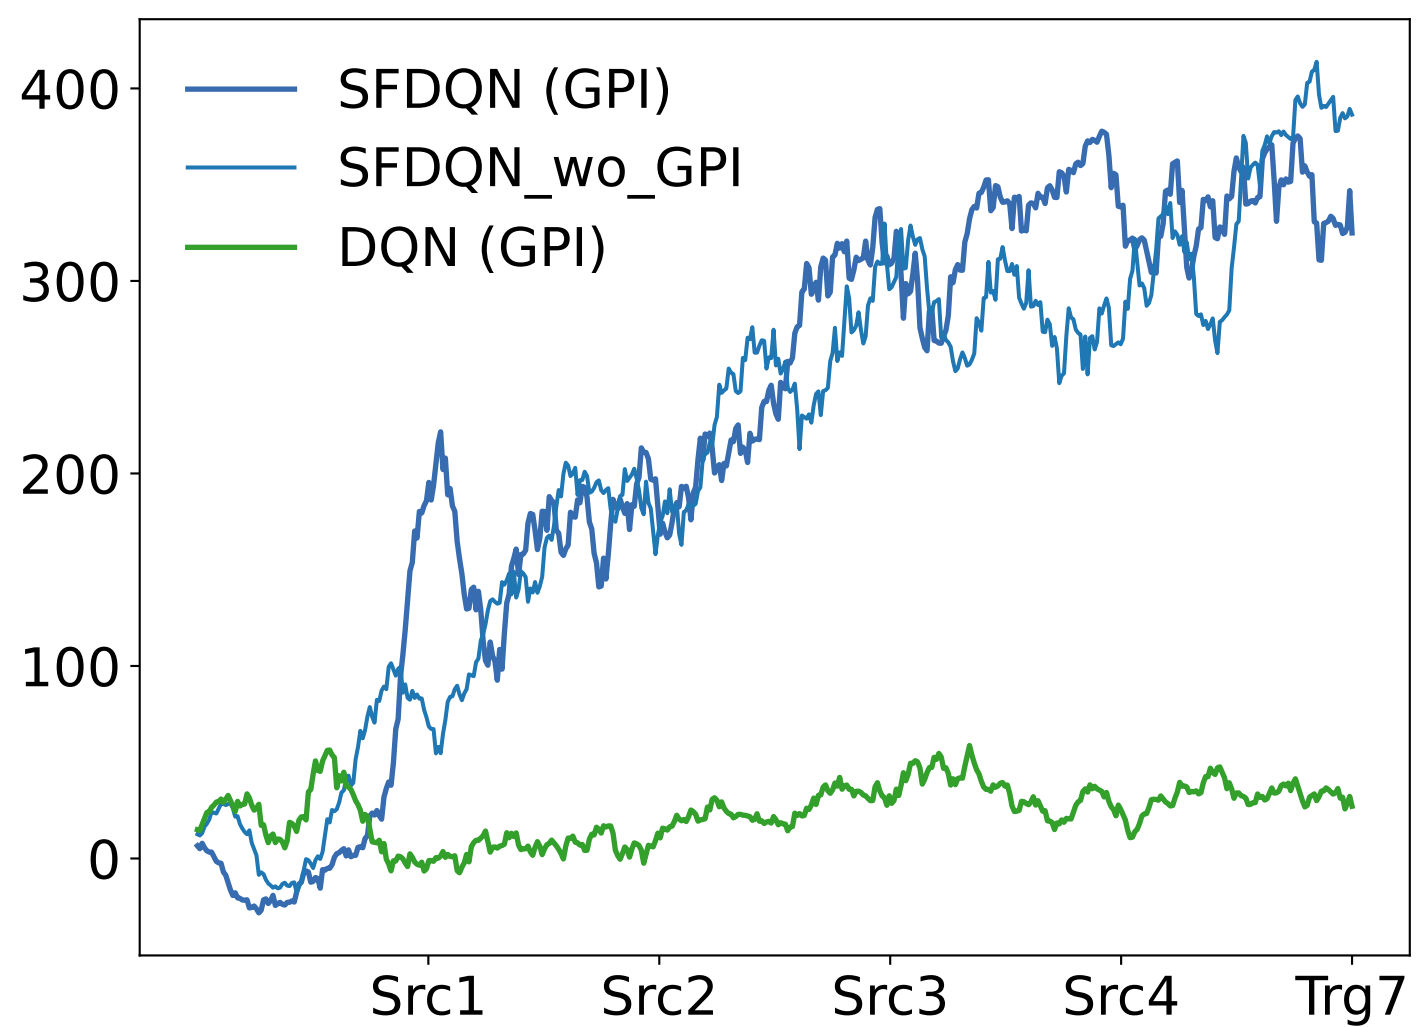

Supplement: supplementary_material [file attachment]

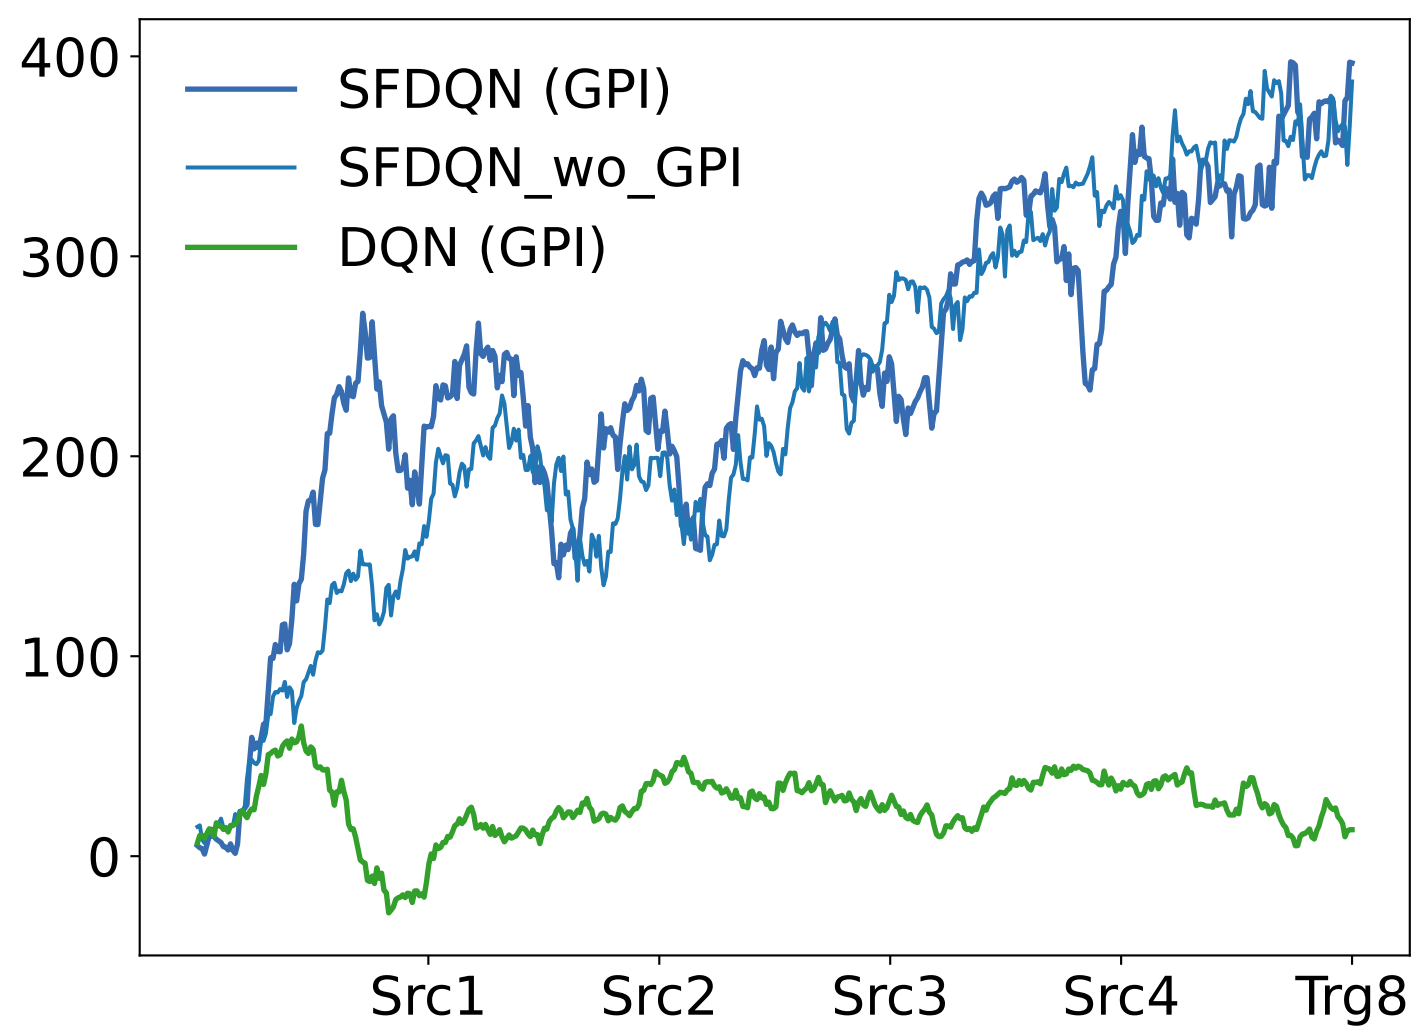

Supplement: supplementary_material [file attachment]

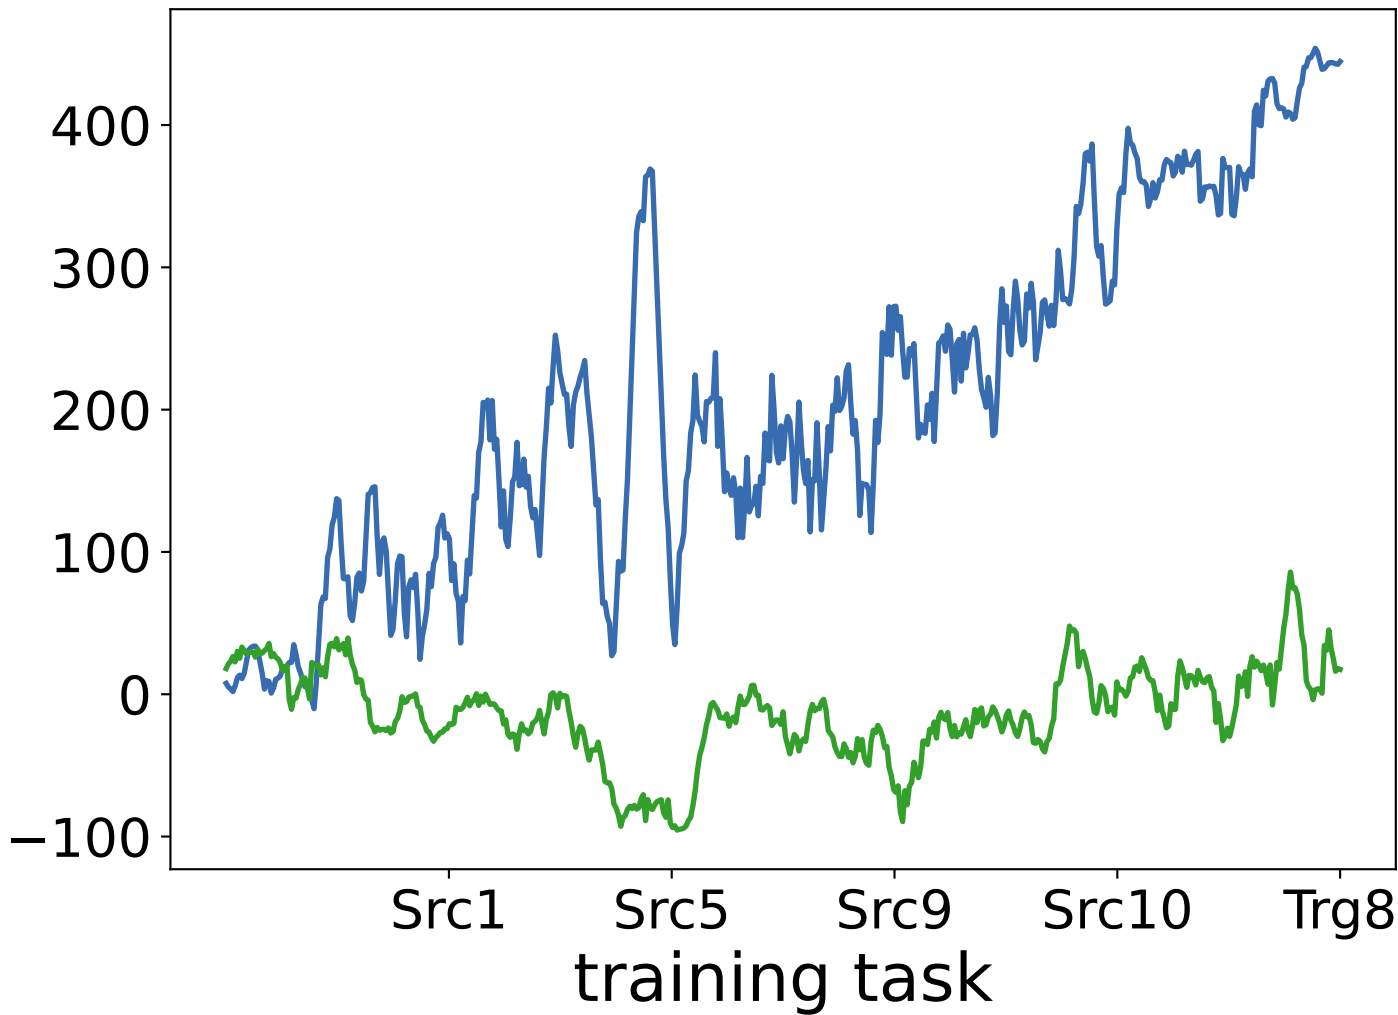

Supplement: supplementary_material [file attachment]

target task reward

SFDQN (GPI)  
SFDQN\_wo\_GPI  
DQN (GPI)

Src1

Trg

training task

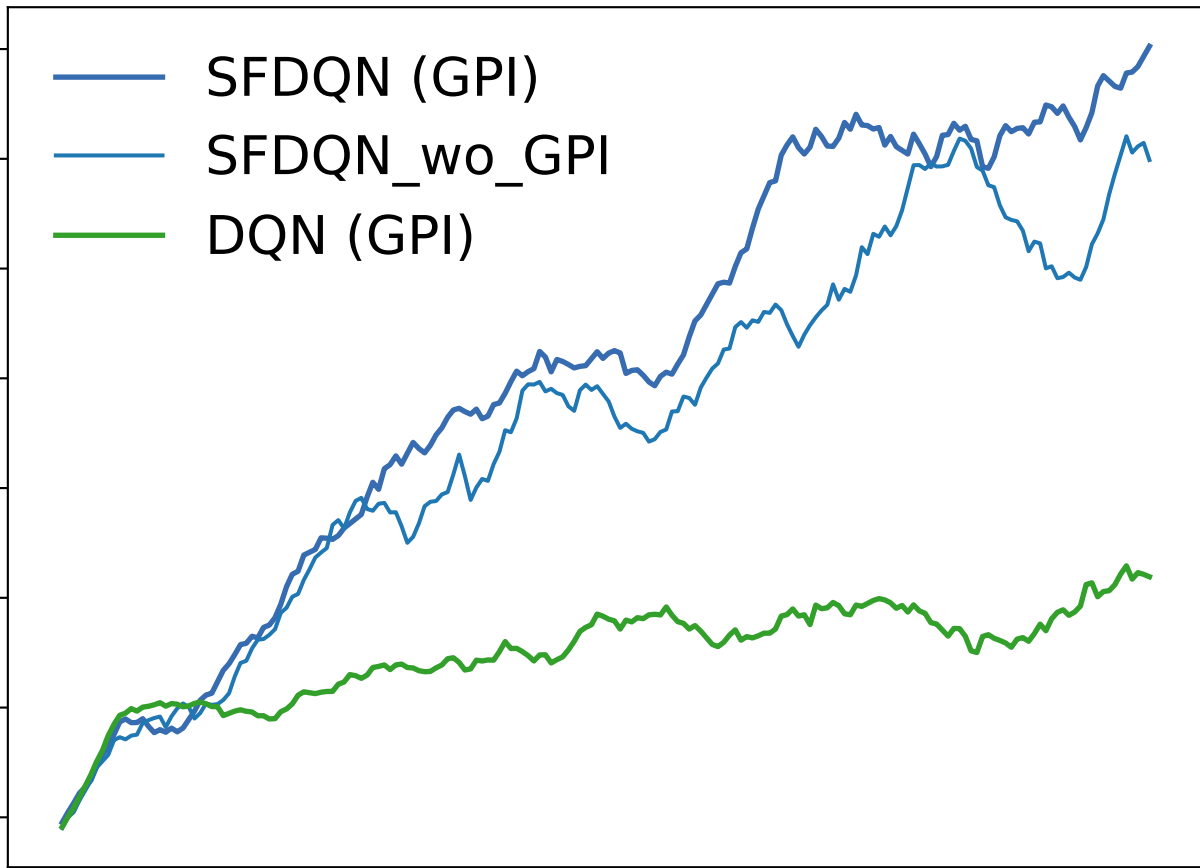

Supplement: supplementary_material [file attachment]

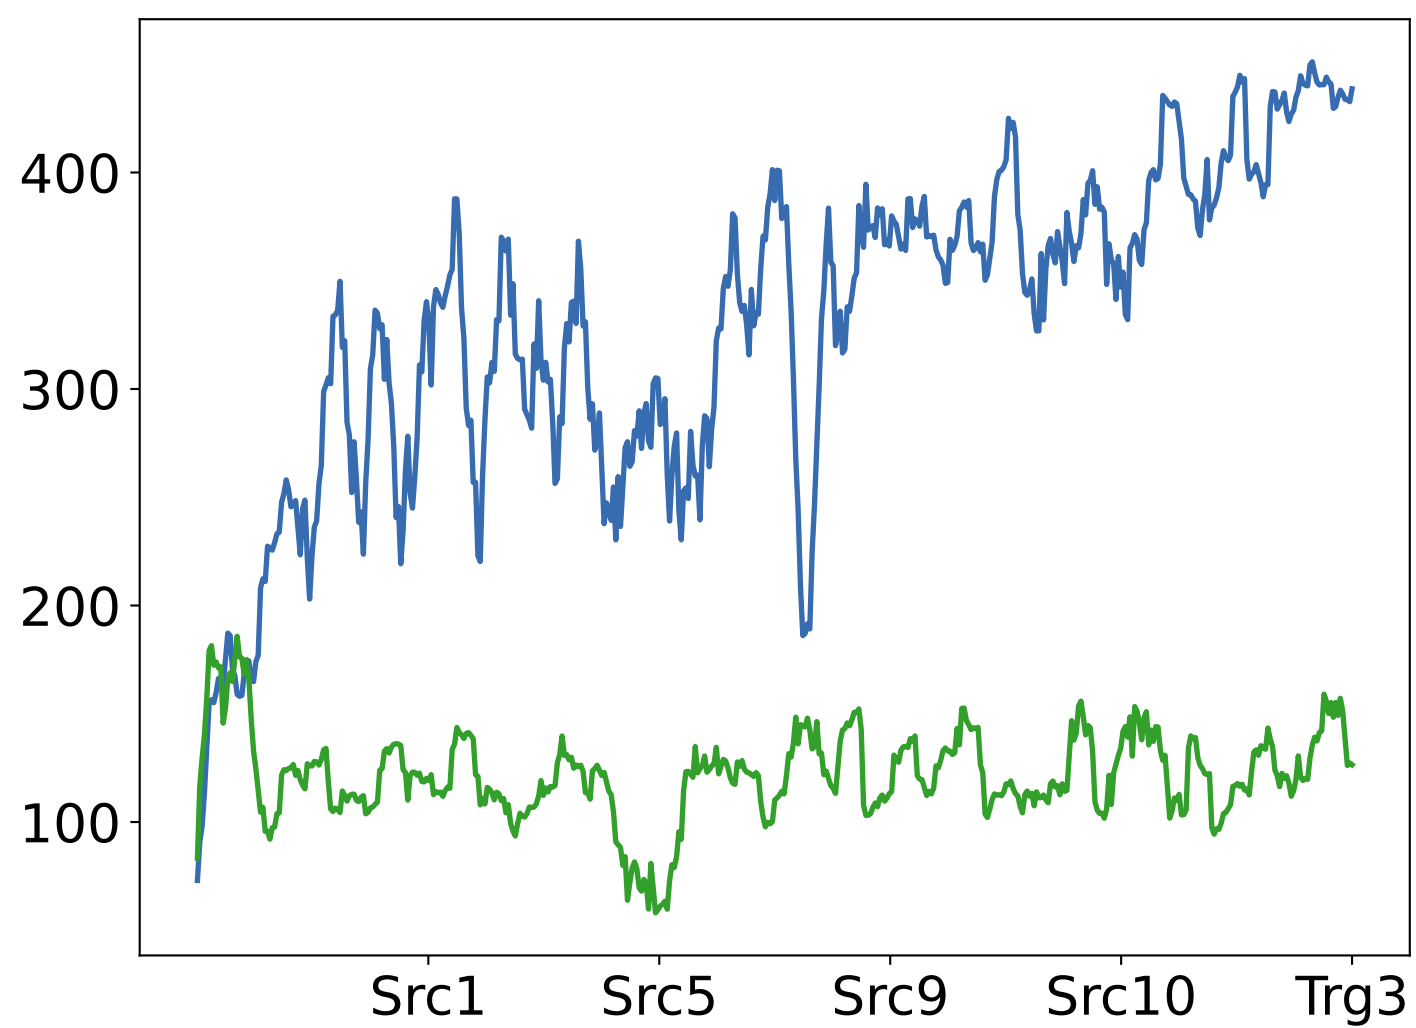

Supplement: supplementary_material [file attachment]

target task reward

400  
300  
200  
100  
0

Src1

Src2

Src3

Src4

Trg5

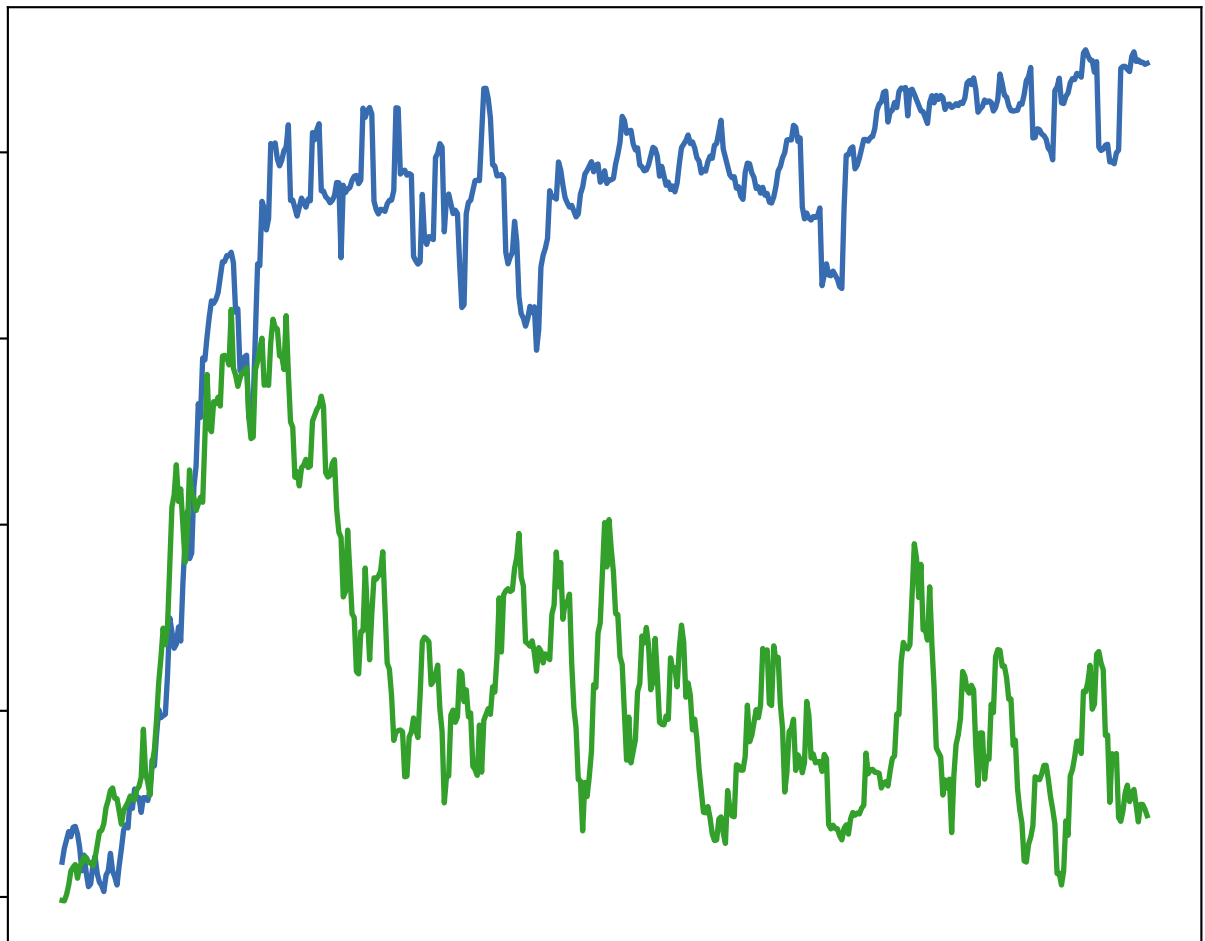

Supplement: supplementary_material [file attachment]

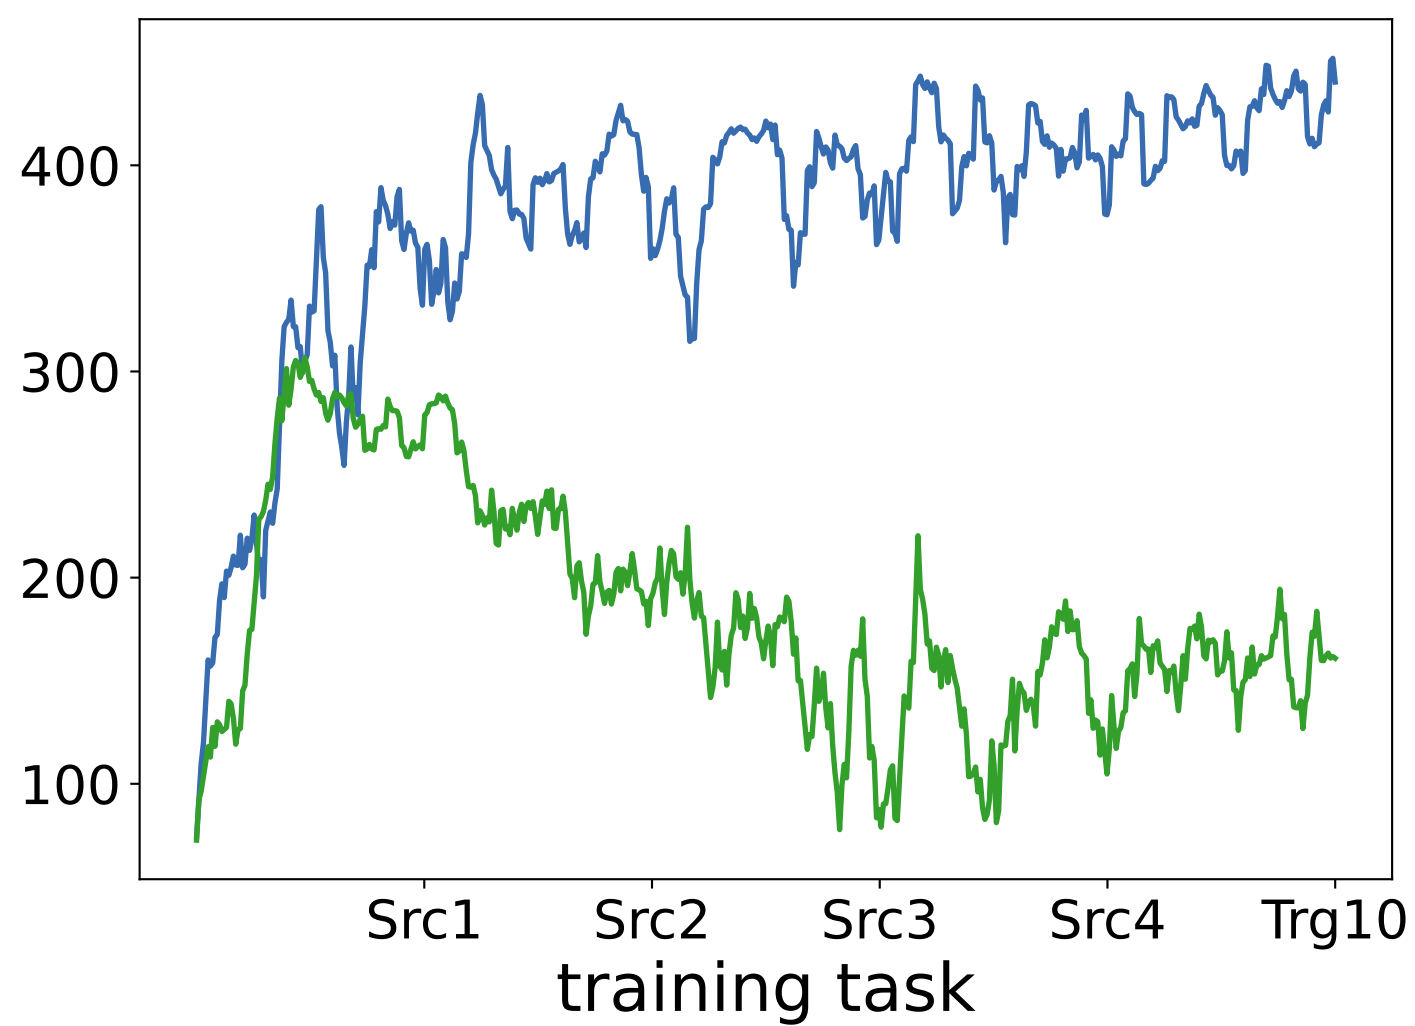

Supplement: supplementary_material [file attachment]

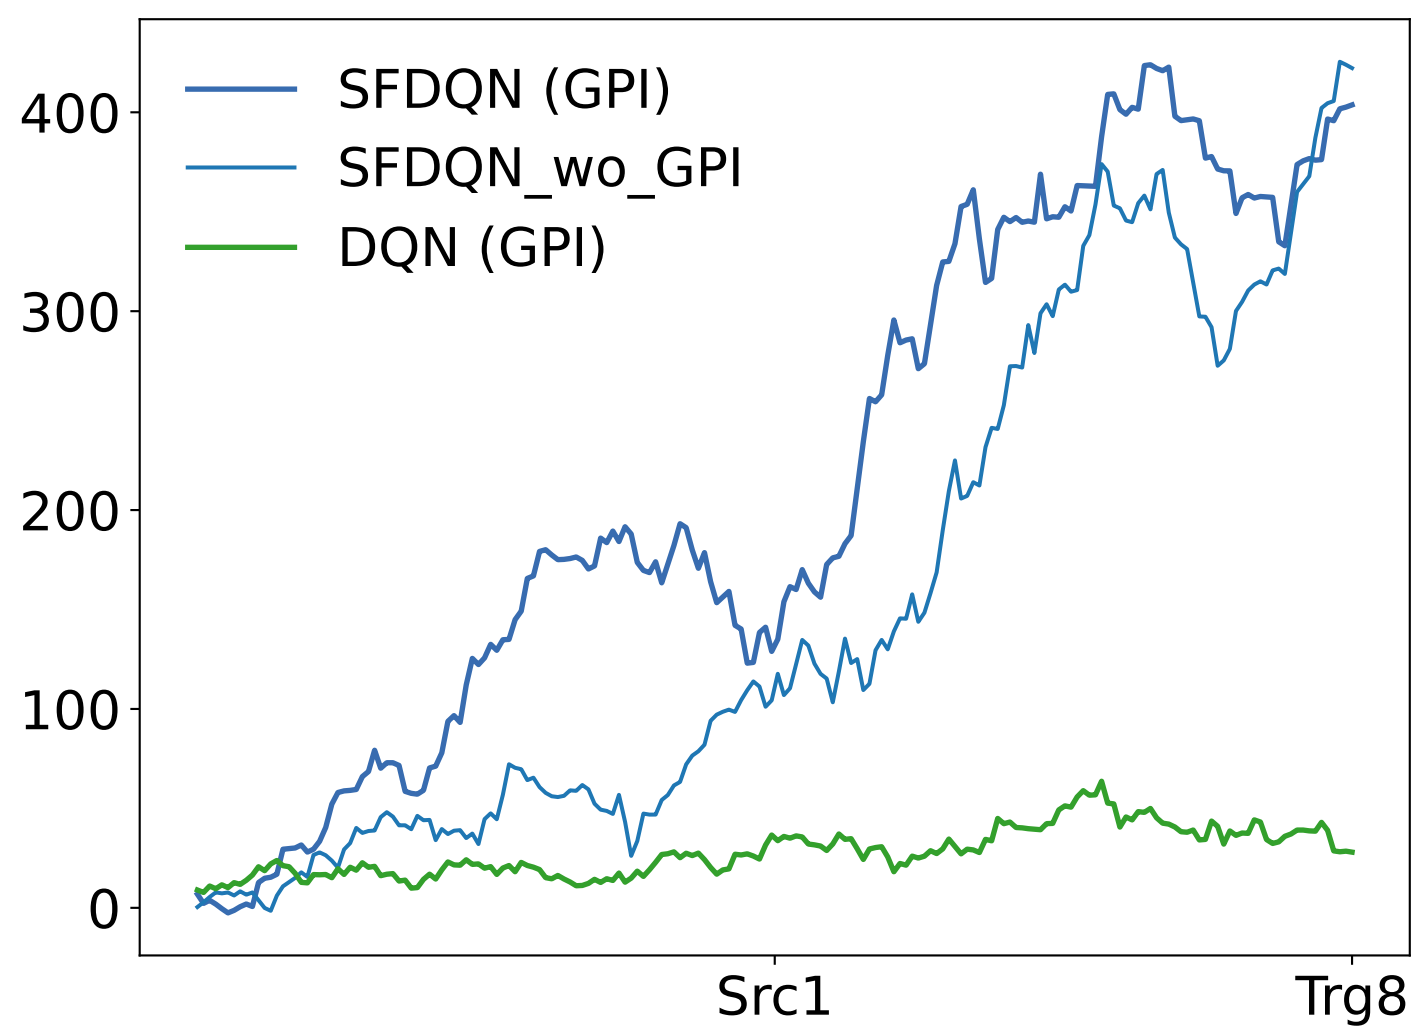

Supplement: supplementary_material [file attachment]

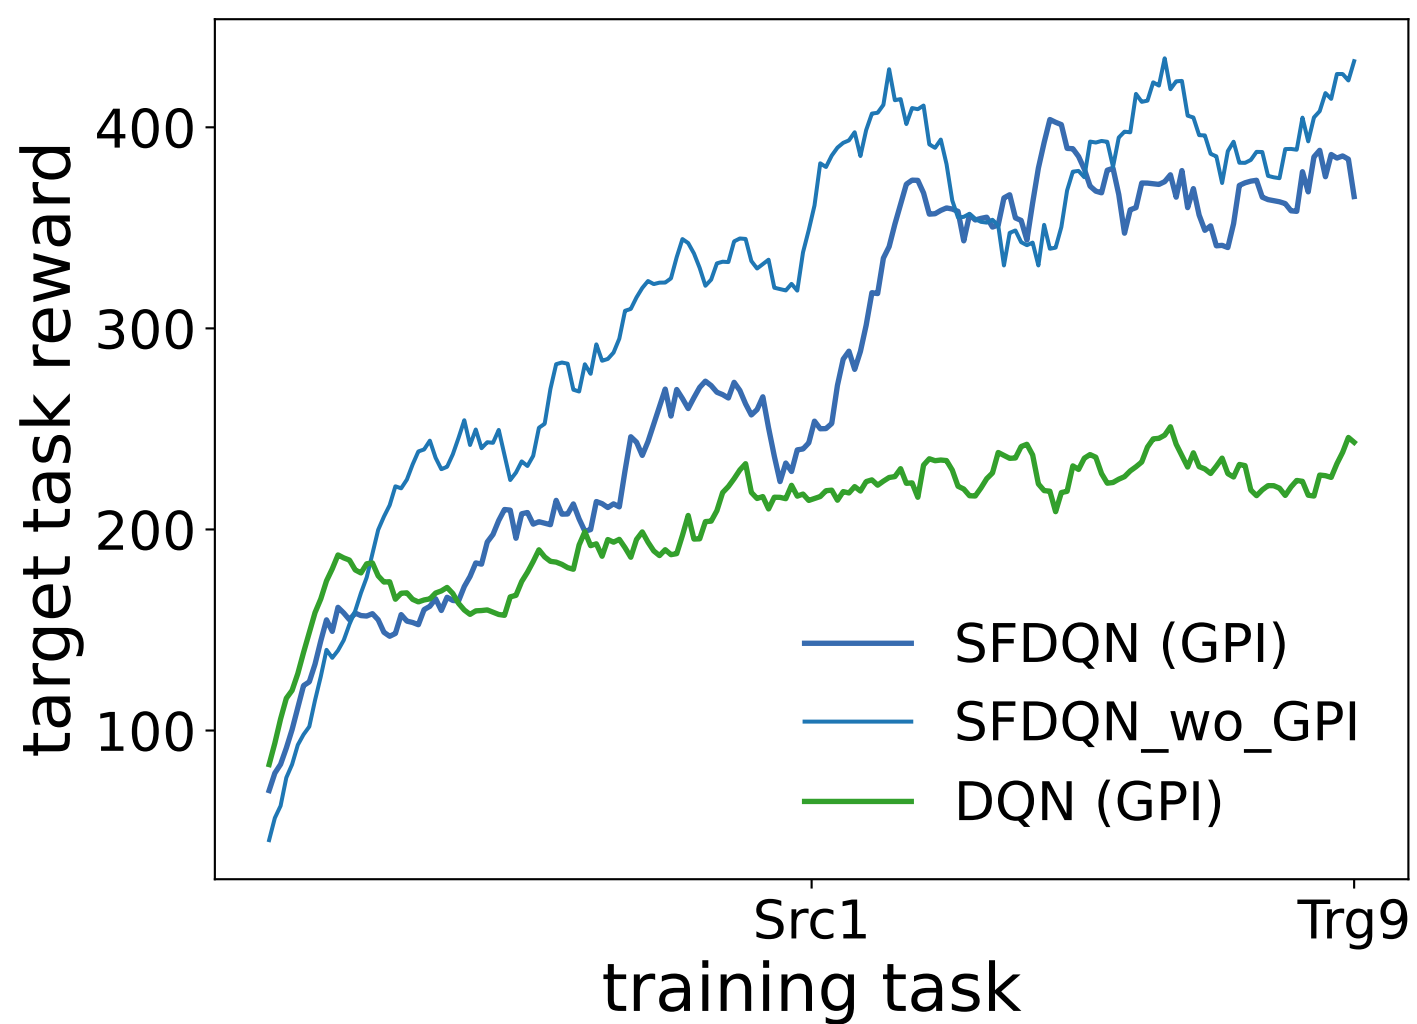

Supplement: supplementary_material [file attachment]

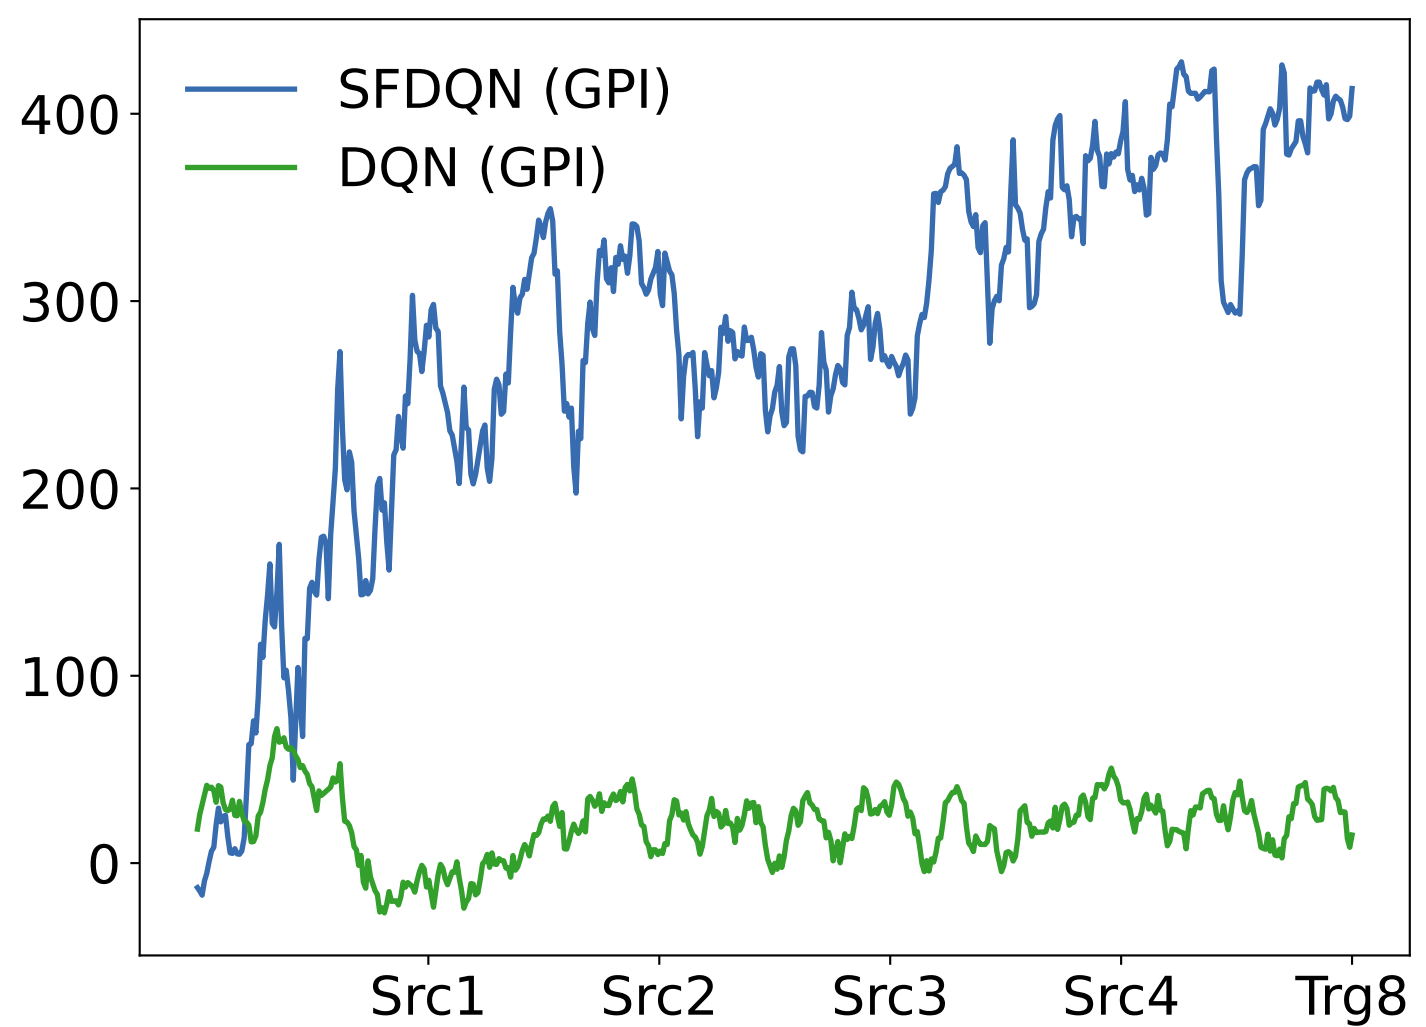

Supplement: supplementary_material [file attachment]

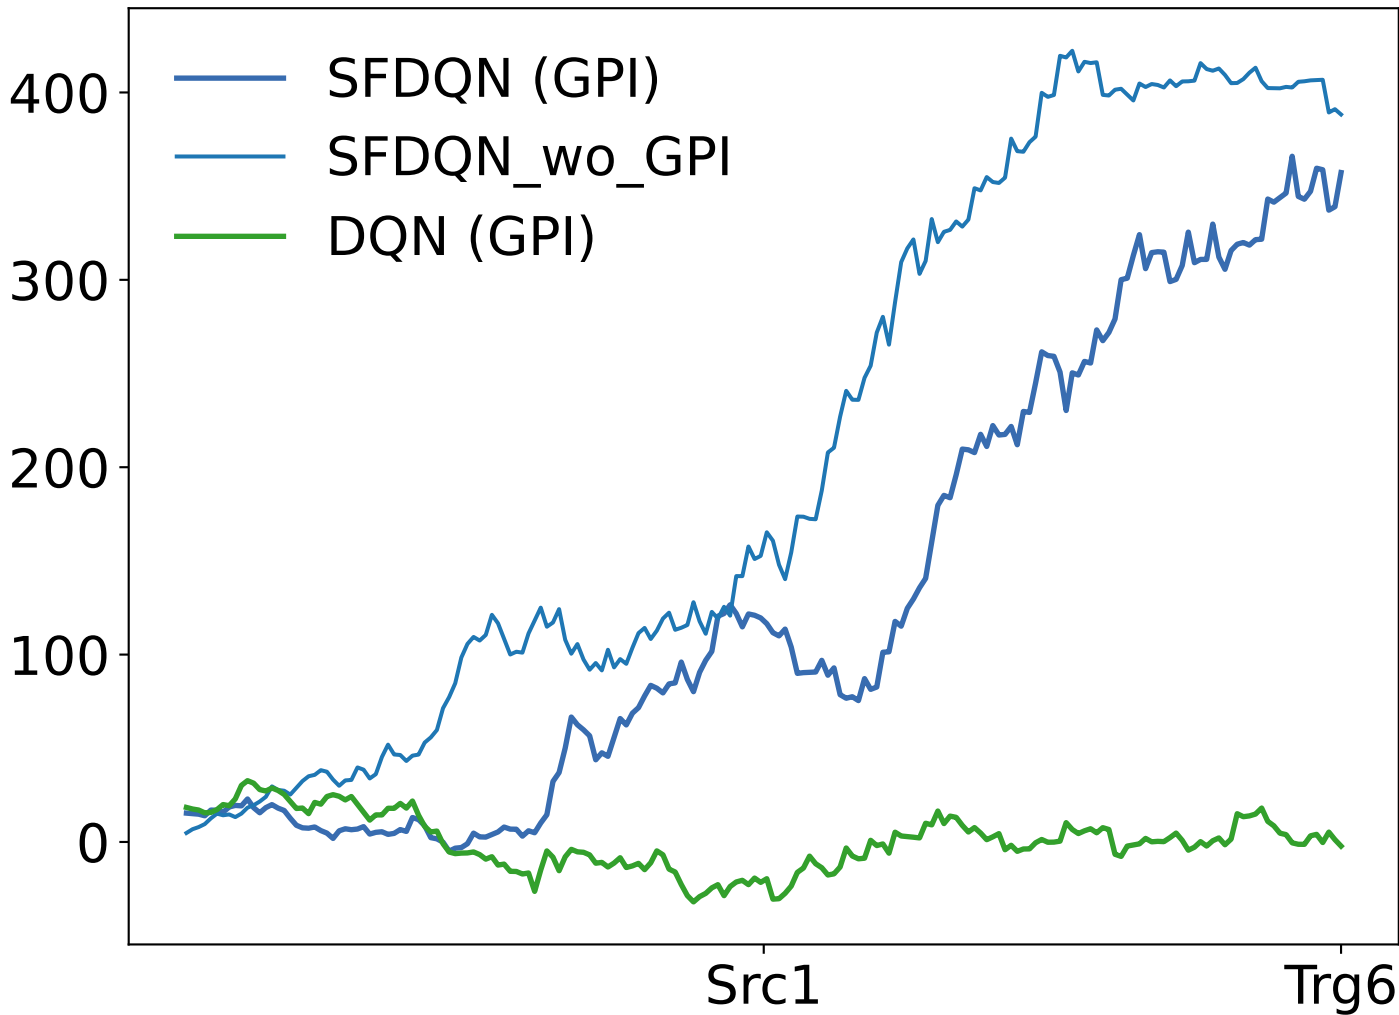

Supplement: supplementary_material [file attachment]

target task reward

400  
300  
200  
100

Src1

Src2

Src3

Src4

Trg9

training task

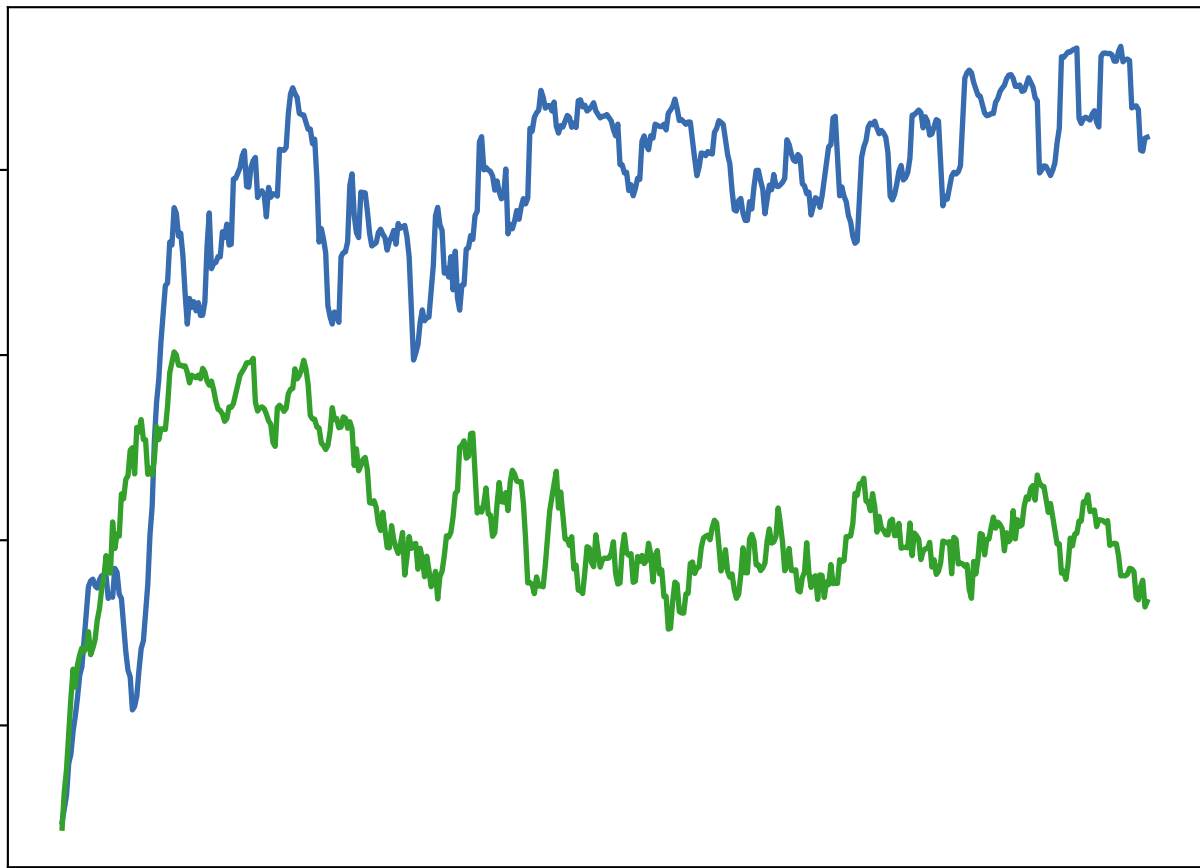

Supplement: supplementary_material [file attachment]

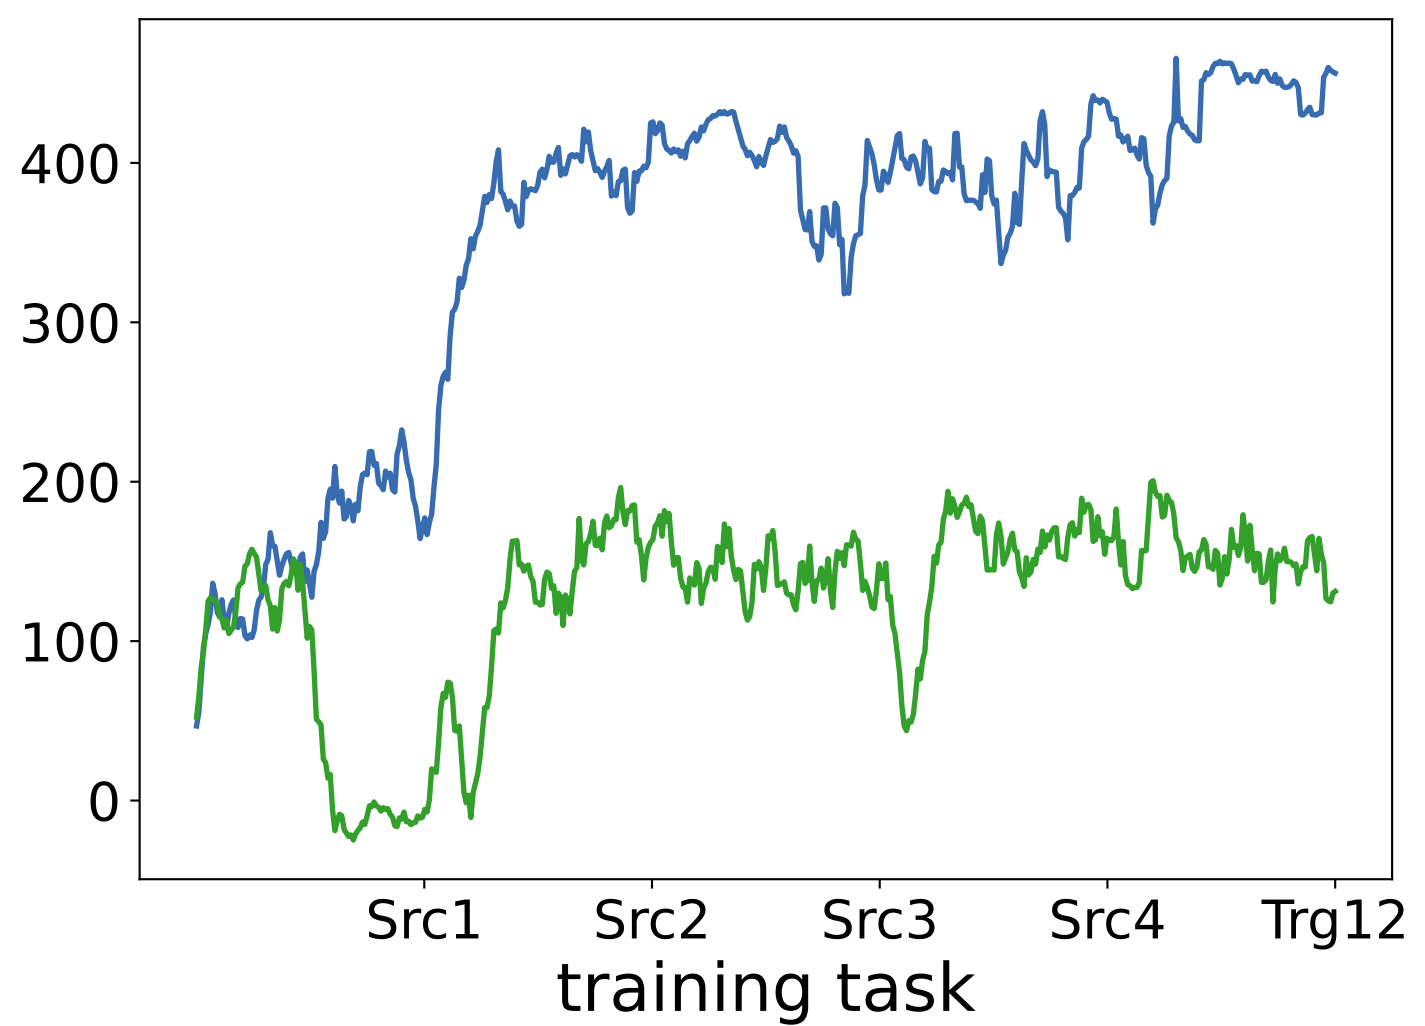

Supplement: supplementary_material [file attachment]

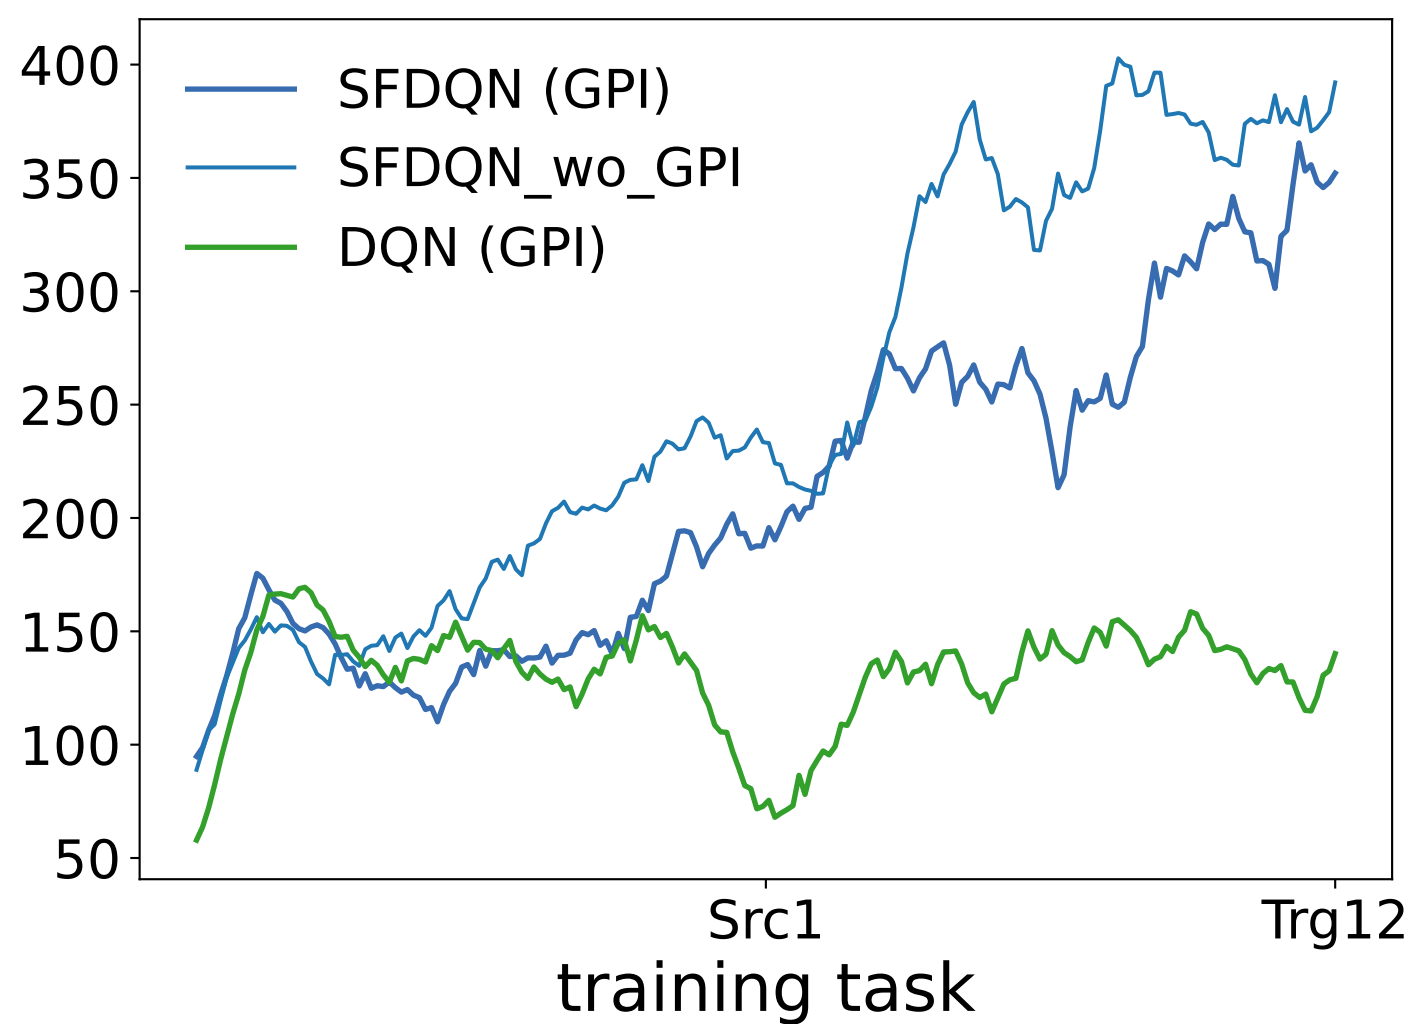

Supplement: supplementary_material [file attachment]

target task reward

SFDQN (GPI)  
SFDQN\_wo\_GPI  
DQN (GPI)

Src1

Trg5

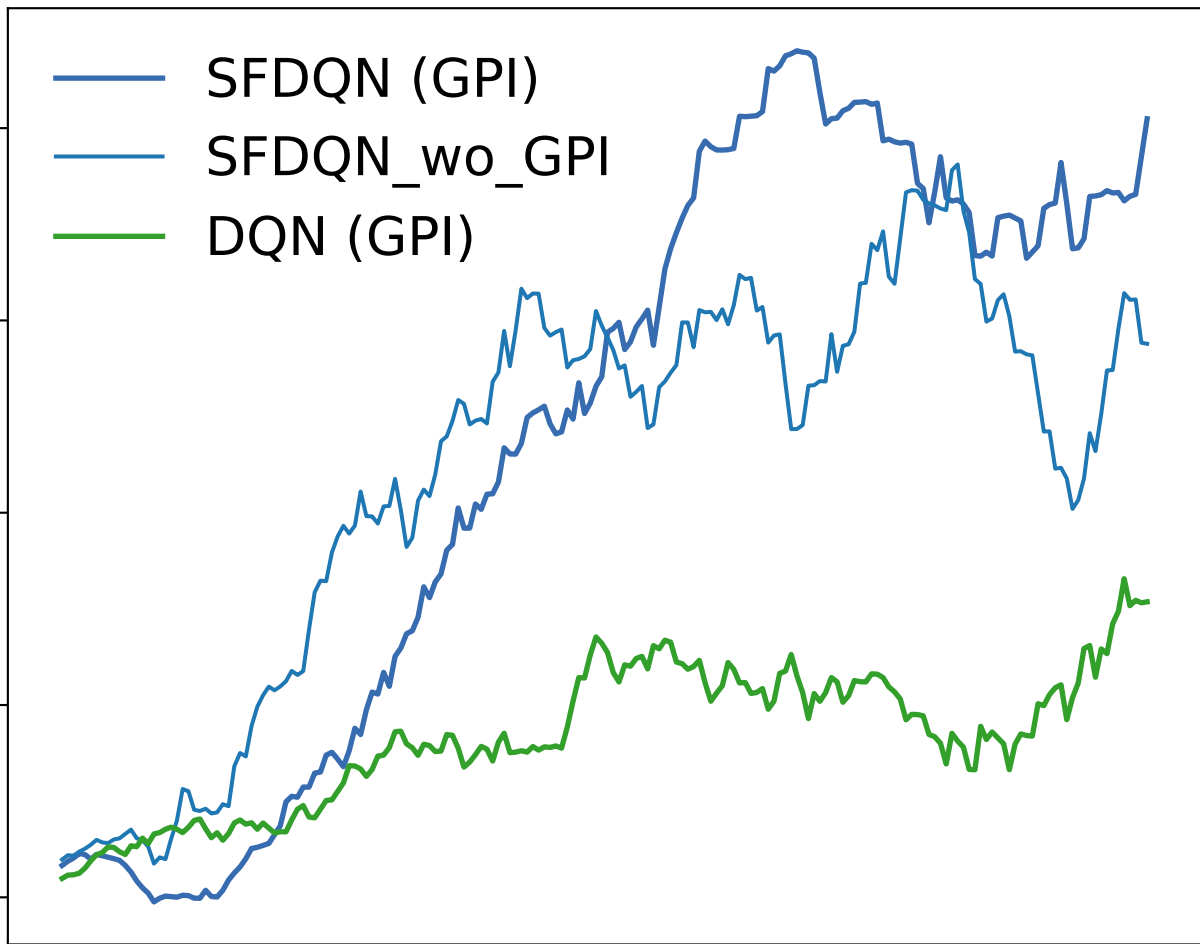

Supplement: supplementary_material [file attachment]

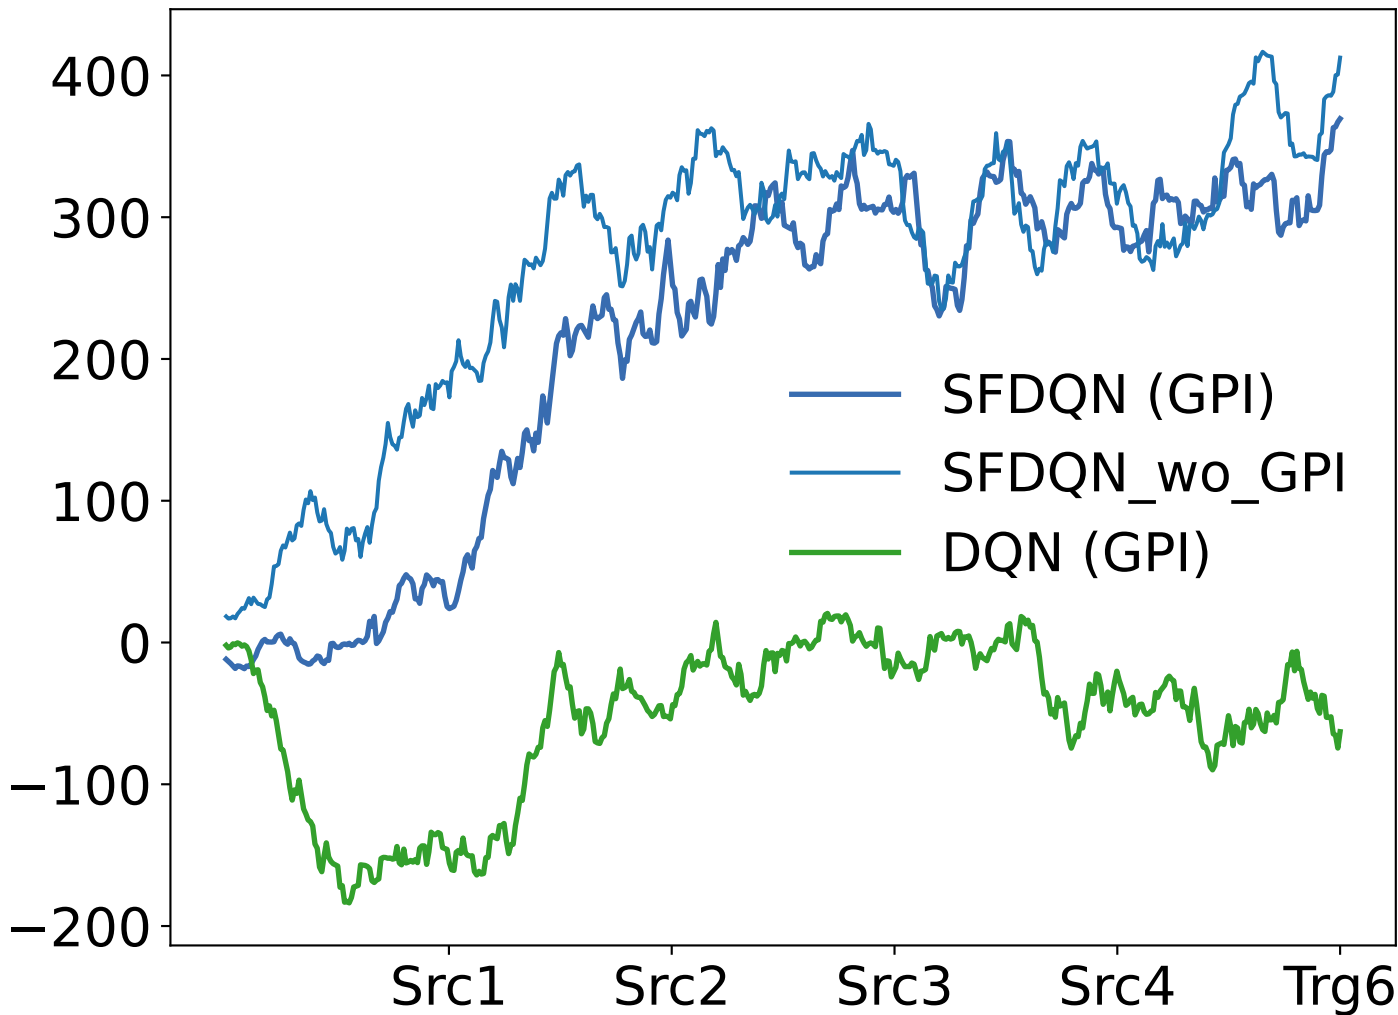

Supplement: supplementary_material [file attachment]

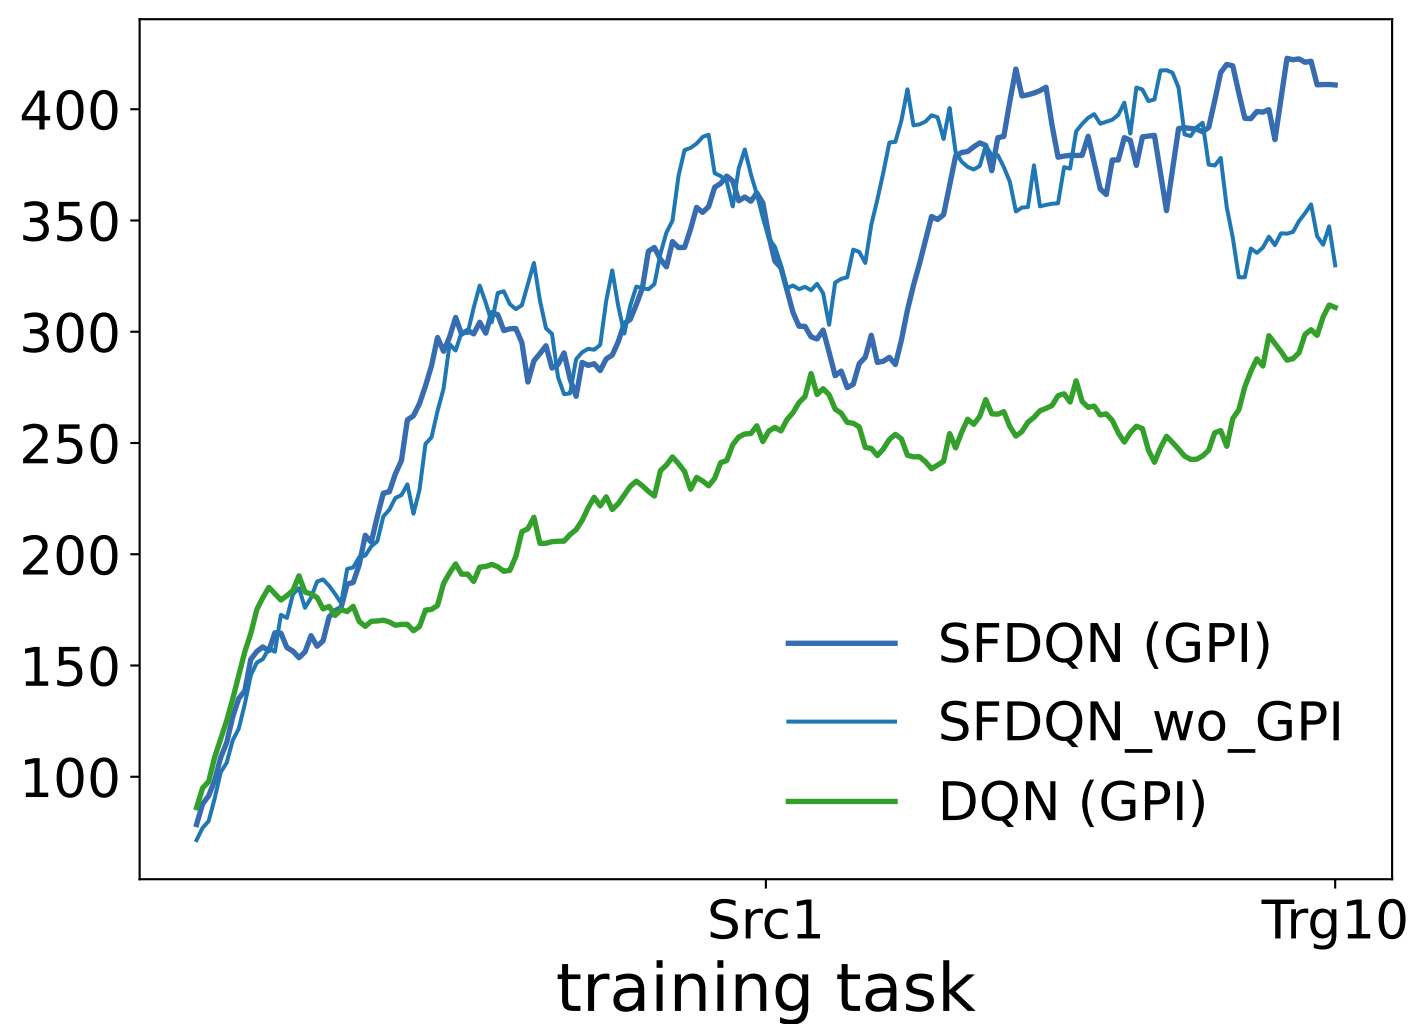

Supplement: supplementary_material [file attachment]

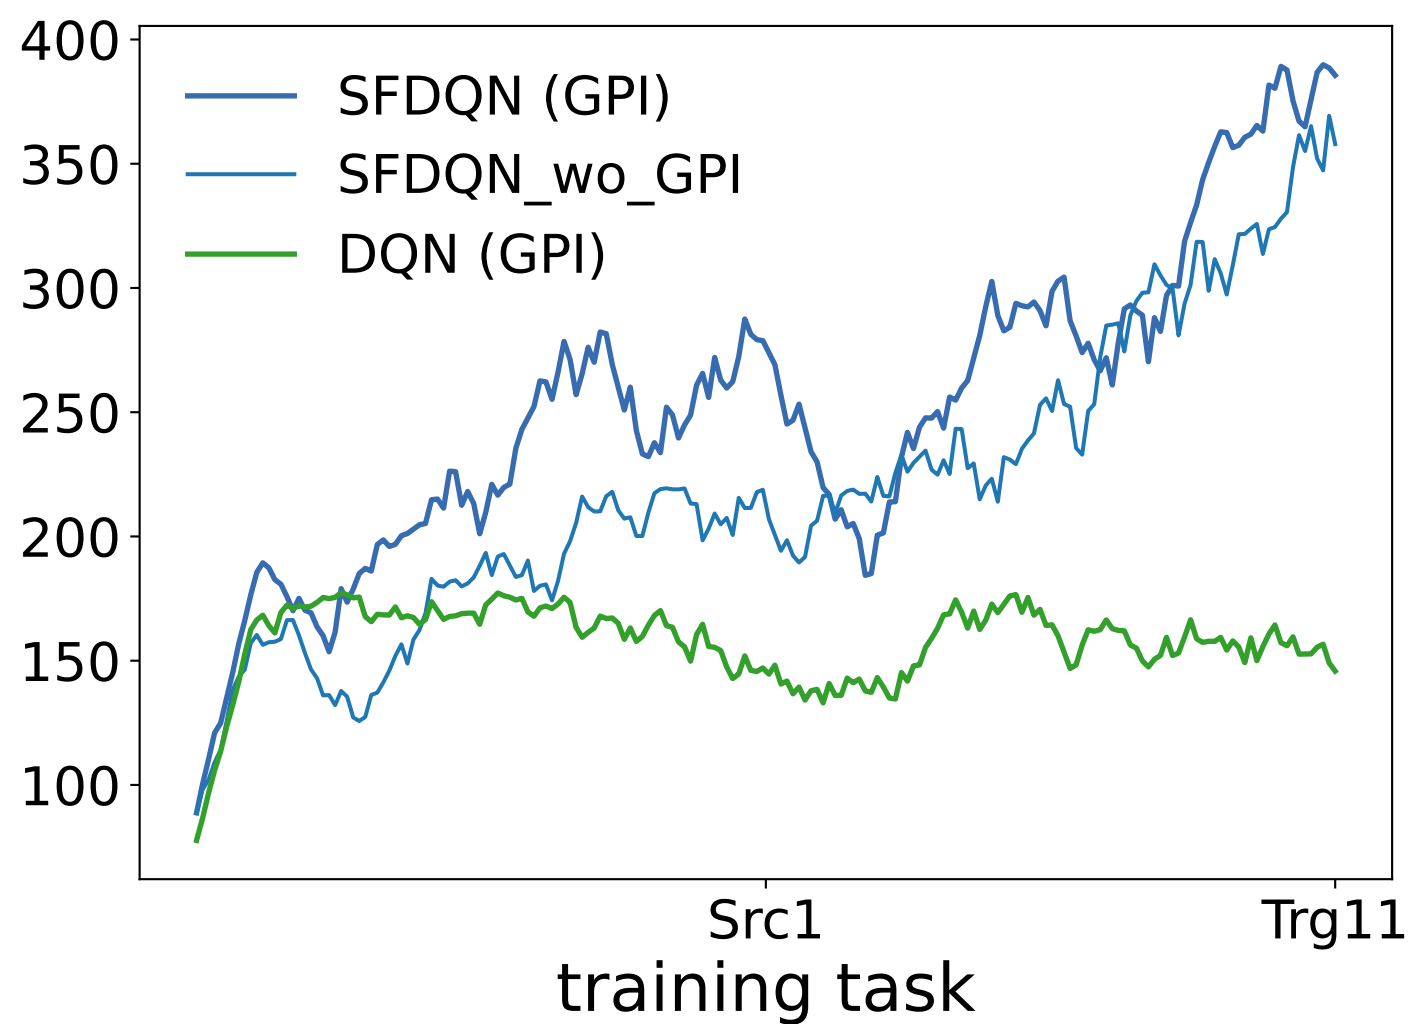

Supplement: supplementary_material [file attachment]
